# Supplementary material for: Traceless Redox-Annulations of Alicyclic Amines
Source: PubMed Central journal article supplement — SynOpen. Author manuscript; Available in PMC 2021 Jul 28. (PMC8318209; doi:10.1055/s-0040-1706004), 2020-12-16

Supporting Information  
for DOI: 10.1055/s-0040-1706004  
© 2020. The Author(s).  
Georg Thieme Verlag KG, Rüdigerstraße 14, 70469 Stuttgart, Germany

## Traceless Redox-Annulations of Alicyclic Amines

Dillon R. L. Rickertsen,<sup>a,†</sup> Longle Ma,<sup>b,†</sup> Anirudra Paul,<sup>a</sup> Khalil A. Abboud,<sup>c</sup> and Daniel Seidel<sup>a, \*</sup>

<sup>a</sup> *Center for Heterocyclic Compounds, Department of Chemistry, University of Florida, Gainesville, Florida 32611, United States*

<sup>b</sup> *Department of chemistry and Chemical Biology, Rutgers, The State University of New Jersey, Piscataway, New Jersey 08854, United States*

<sup>c</sup> *Center for X-ray Crystallography, Department of Chemistry, University of Florida, Gainesville, Florida 32611, United States*

\* Correspondence to: seidel@chem.ufl.edu

† These authors contributed equally to this work.

### Supporting Information

#### Table of Contents

|                                                                        |      |
|------------------------------------------------------------------------|------|
| Crystallographic Summary Tables of Compound ( $\pm$ )- <b>2e</b> ..... | S-2  |
| <sup>1</sup> H- and <sup>13</sup> C-NMR Spectra .....                  | S-18 |

## Crystallographic Summary for Compound ( $\pm$ )-2e

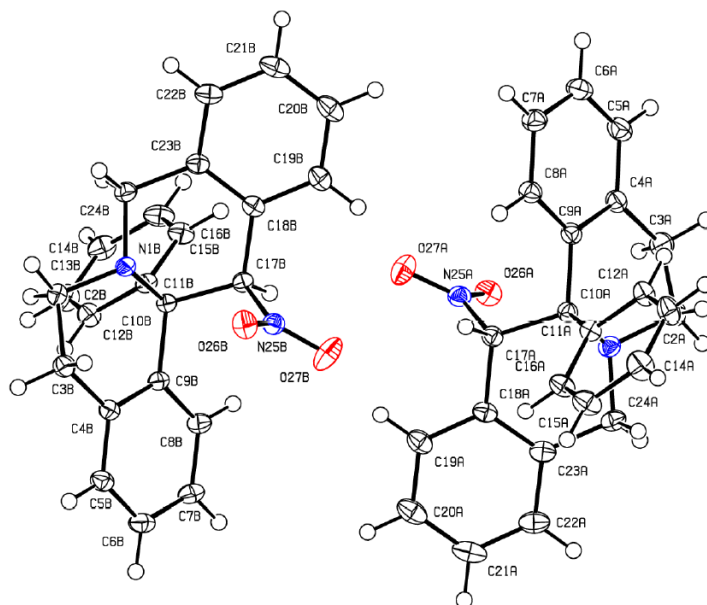

The requisite CIF of ( $\pm$ )-2e was submitted to the journal and deposited with the CCDC (deposition # 202419)

### Supplementary Table 1. Crystal data and structure refinement for rick1.

|                        |                              |                  |
|------------------------|------------------------------|------------------|
| Identification code    | rick1                        |                  |
| Empirical formula      | $C_{23}H_{20}N_2O_2$         |                  |
| Formula weight         | 356.41                       |                  |
| Temperature            | 100(2) K                     |                  |
| Wavelength             | 0.71073 Å                    |                  |
| Crystal system         | Orthorhombic                 |                  |
| Space group            | $P2_12_12_1$                 |                  |
| Unit cell dimensions   | $a = 7.5713(2)$ Å            | $a = 90^\circ$ . |
|                        | $b = 16.9061(5)$ Å           | $b = 90^\circ$ . |
|                        | $c = 28.2644(8)$ Å           | $g = 90^\circ$ . |
| Volume                 | $3617.88(18)$ Å <sup>3</sup> |                  |
| Z                      | 8                            |                  |
| Density (calculated)   | 1.309 Mg/m <sup>3</sup>      |                  |
| Absorption coefficient | 0.084 mm <sup>-1</sup>       |                  |
| F(000)                 | 1504                         |                  |
| Crystal size           | ? x ? x ? mm <sup>3</sup>    |                  |

|                                   |                                             |
|-----------------------------------|---------------------------------------------|
| Theta range for data collection   | 1.878 to 33.209°.                           |
| Index ranges                      | -11≤h≤11, -26≤k≤25, -41≤l≤41                |
| Reflections collected             | 99381                                       |
| Independent reflections           | 12862 [R(int) = 0.0594]                     |
| Completeness to theta = 25.000°   | 99.7 %                                      |
| Absorption correction             | "Multi                                      |
| Refinement method                 | Full-matrix least-squares on F <sup>2</sup> |
| Data / restraints / parameters    | 12862 / 0 / 487                             |
| Goodness-of-fit on F <sup>2</sup> | 1.028                                       |
| Final R indices [I>2sigma(I)]     | R1 = 0.0404, wR2 = 0.1004 [11228]           |
| R indices (all data)              | R1 = 0.0500, wR2 = 0.1058                   |
| Absolute structure parameter      | 0.4(3)                                      |
| Largest diff. peak and hole       | 0.330 and -0.198 e.Å <sup>-3</sup>          |

Table 2. Atomic coordinates ( $\times 10^4$ ) and equivalent isotropic displacement parameters ( $\text{\AA}^2 \times 10^3$ ) for rick1.  $U(\text{eq})$  is defined as one third of the trace of the orthogonalized  $U^{ij}$  tensor.

|      | x       | y       | z       | U(eq) |
|------|---------|---------|---------|-------|
| O26A | 2250(2) | 3640(1) | 7148(1) | 24(1) |
| O26B | 7224(2) | 6319(1) | 5680(1) | 25(1) |
| O27A | 4128(2) | 4061(1) | 6630(1) | 30(1) |
| O27B | 5241(2) | 5950(1) | 6180(1) | 35(1) |
| N1A  | 2098(2) | 4637(1) | 8000(1) | 18(1) |
| N1B  | 7425(2) | 5277(1) | 4842(1) | 16(1) |
| N25A | 3238(2) | 4145(1) | 6990(1) | 20(1) |
| N25B | 6187(2) | 5834(1) | 5835(1) | 19(1) |
| C2A  | 2230(2) | 4234(1) | 8454(1) | 22(1) |
| C2B  | 7349(2) | 5627(1) | 4370(1) | 18(1) |
| C3A  | 3029(2) | 3422(1) | 8373(1) | 25(1) |
| C3B  | 6493(2) | 6436(1) | 4405(1) | 19(1) |
| C4A  | 4770(2) | 3493(1) | 8121(1) | 20(1) |
| C4B  | 4746(2) | 6386(1) | 4655(1) | 17(1) |
| C5A  | 6073(2) | 2913(1) | 8179(1) | 24(1) |
| C5B  | 3438(2) | 6953(1) | 4570(1) | 20(1) |
| C6A  | 7695(2) | 2977(1) | 7957(1) | 25(1) |

|      |          |         |         |       |
|------|----------|---------|---------|-------|
| C6B  | 1804(2)  | 6912(1) | 4789(1) | 22(1) |
| C7A  | 8048(2)  | 3627(1) | 7669(1) | 23(1) |
| C7B  | 1448(2)  | 6302(1) | 5107(1) | 22(1) |
| C8A  | 6762(2)  | 4204(1) | 7607(1) | 20(1) |
| C8B  | 2742(2)  | 5741(1) | 5198(1) | 19(1) |
| C9A  | 5115(2)  | 4148(1) | 7832(1) | 17(1) |
| C9B  | 4393(2)  | 5773(1) | 4974(1) | 16(1) |
| C10A | 3796(2)  | 4828(1) | 7773(1) | 16(1) |
| C10B | 5706(2)  | 5102(1) | 5063(1) | 15(1) |
| C11A | 4637(2)  | 5595(1) | 7976(1) | 17(1) |
| C11B | 4869(2)  | 4323(1) | 4879(1) | 17(1) |
| C12A | 5688(2)  | 5546(1) | 8382(1) | 21(1) |
| C12B | 3940(2)  | 4336(1) | 4450(1) | 21(1) |
| C13A | 6401(3)  | 6219(1) | 8590(1) | 26(1) |
| C13B | 3210(2)  | 3651(1) | 4258(1) | 24(1) |
| C14A | 6074(3)  | 6962(1) | 8396(1) | 29(1) |
| C14B | 3385(2)  | 2934(1) | 4494(1) | 25(1) |
| C15A | 5050(2)  | 7021(1) | 7990(1) | 26(1) |
| C15B | 4283(2)  | 2911(1) | 4921(1) | 26(1) |
| C16A | 4343(2)  | 6346(1) | 7782(1) | 21(1) |
| C16B | 5017(2)  | 3597(1) | 5112(1) | 21(1) |
| C17A | 3383(2)  | 4945(1) | 7239(1) | 17(1) |
| C17B | 6064(2)  | 5020(1) | 5604(1) | 16(1) |
| C18A | 1696(2)  | 5401(1) | 7138(1) | 19(1) |
| C18B | 7727(2)  | 4568(1) | 5726(1) | 18(1) |
| C19A | 1394(2)  | 5680(1) | 6679(1) | 23(1) |
| C19B | 7981(2)  | 4303(1) | 6191(1) | 22(1) |
| C20A | -104(2)  | 6126(1) | 6581(1) | 27(1) |
| C20B | 9462(2)  | 3860(1) | 6305(1) | 26(1) |
| C21A | -1288(2) | 6299(1) | 6942(1) | 28(1) |
| C21B | 10714(2) | 3689(1) | 5961(1) | 26(1) |
| C22A | -980(2)  | 6032(1) | 7398(1) | 25(1) |
| C22B | 10464(2) | 3949(1) | 5500(1) | 22(1) |
| C23A | 510(2)   | 5571(1) | 7500(1) | 21(1) |
| C23B | 8969(2)  | 4388(1) | 5378(1) | 18(1) |
| C24A | 834(2)   | 5284(1) | 7996(1) | 22(1) |

|      |         |         |         |       |
|------|---------|---------|---------|-------|
| C24B | 8677(2) | 4630(1) | 4874(1) | 19(1) |
|------|---------|---------|---------|-------|

---

**Supplementary Table 3.** Bond lengths [Å] and angles [°] for rick1.

---

|           |            |
|-----------|------------|
| O26A-N25A | 1.2198(18) |
| O26B-N25B | 1.2175(17) |
| O27A-N25A | 1.2278(18) |
| O27B-N25B | 1.2267(18) |
| N1A-C24A  | 1.4538(19) |
| N1A-C2A   | 1.4571(19) |
| N1A-C10A  | 1.4727(19) |
| N1B-C24B  | 1.4501(18) |
| N1B-C2B   | 1.4588(18) |
| N1B-C10B  | 1.4741(18) |
| N25A-C17A | 1.5282(18) |
| N25B-C17B | 1.5259(18) |
| C2A-C3A   | 1.518(2)   |
| C2A-H2AA  | 0.9900     |
| C2A-H2AB  | 0.9900     |
| C2B-C3B   | 1.516(2)   |
| C2B-H2BA  | 0.9900     |
| C2B-H2BB  | 0.9900     |
| C3A-C4A   | 1.503(2)   |
| C3A-H3AA  | 0.9900     |
| C3A-H3AB  | 0.9900     |
| C3B-C4B   | 1.503(2)   |
| C3B-H3BA  | 0.9900     |
| C3B-H3BB  | 0.9900     |
| C4A-C9A   | 1.3992(19) |
| C4A-C5A   | 1.401(2)   |
| C4B-C9B   | 1.3992(19) |
| C4B-C5B   | 1.399(2)   |
| C5A-C6A   | 1.383(3)   |
| C5A-H5AA  | 0.9500     |

|           |            |
|-----------|------------|
| C5B-C6B   | 1.385(2)   |
| C5B-H5BA  | 0.9500     |
| C6A-C7A   | 1.392(2)   |
| C6A-H6AA  | 0.9500     |
| C6B-C7B   | 1.394(2)   |
| C6B-H6BA  | 0.9500     |
| C7A-C8A   | 1.390(2)   |
| C7A-H7AA  | 0.9500     |
| C7B-C8B   | 1.389(2)   |
| C7B-H7BA  | 0.9500     |
| C8A-C9A   | 1.403(2)   |
| C8A-H8AA  | 0.9500     |
| C8B-C9B   | 1.402(2)   |
| C8B-H8BA  | 0.9500     |
| C9A-C10A  | 1.533(2)   |
| C9B-C10B  | 1.5296(19) |
| C10A-C11A | 1.553(2)   |
| C10A-C17A | 1.553(2)   |
| C10B-C11B | 1.5518(19) |
| C10B-C17B | 1.5576(19) |
| C11A-C16A | 1.400(2)   |
| C11A-C12A | 1.401(2)   |
| C11B-C16B | 1.397(2)   |
| C11B-C12B | 1.401(2)   |
| C12A-C13A | 1.390(2)   |
| C12A-H12A | 0.9500     |
| C12B-C13B | 1.394(2)   |
| C12B-H12B | 0.9500     |
| C13A-C14A | 1.392(2)   |
| C13A-H13A | 0.9500     |
| C13B-C14B | 1.389(2)   |
| C13B-H13B | 0.9500     |
| C14A-C15A | 1.387(2)   |
| C14A-H14A | 0.9500     |
| C14B-C15B | 1.386(2)   |
| C14B-H14B | 0.9500     |

|           |          |
|-----------|----------|
| C15A-C16A | 1.391(2) |
| C15A-H15A | 0.9500   |
| C15B-C16B | 1.395(2) |
| C15B-H15B | 0.9500   |
| C16A-H16A | 0.9500   |
| C16B-H16B | 0.9500   |
| C17A-C18A | 1.518(2) |
| C17A-H17A | 1.0000   |
| C17B-C18B | 1.513(2) |
| C17B-H17B | 1.0000   |
| C18A-C23A | 1.392(2) |
| C18A-C19A | 1.397(2) |
| C18B-C23B | 1.394(2) |
| C18B-C19B | 1.400(2) |
| C19A-C20A | 1.389(2) |
| C19A-H19A | 0.9500   |
| C19B-C20B | 1.386(2) |
| C19B-H19B | 0.9500   |
| C20A-C21A | 1.389(3) |
| C20A-H20A | 0.9500   |
| C20B-C21B | 1.388(3) |
| C20B-H20B | 0.9500   |
| C21A-C22A | 1.384(2) |
| C21A-H21A | 0.9500   |
| C21B-C22B | 1.388(2) |
| C21B-H21B | 0.9500   |
| C22A-C23A | 1.401(2) |
| C22A-H22A | 0.9500   |
| C22B-C23B | 1.397(2) |
| C22B-H22B | 0.9500   |
| C23A-C24A | 1.505(2) |
| C23B-C24B | 1.499(2) |
| C24A-H24A | 0.9900   |
| C24A-H24B | 0.9900   |
| C24B-H24C | 0.9900   |
| C24B-H24D | 0.9900   |



|                |            |
|----------------|------------|
| C24A-N1A-C2A   | 113.82(12) |
| C24A-N1A-C10A  | 113.93(11) |
| C2A-N1A-C10A   | 115.32(12) |
| C24B-N1B-C2B   | 112.93(11) |
| C24B-N1B-C10B  | 113.50(11) |
| C2B-N1B-C10B   | 115.80(12) |
| O26A-N25A-O27A | 123.86(13) |
| O26A-N25A-C17A | 119.75(12) |
| O27A-N25A-C17A | 116.38(13) |
| O26B-N25B-O27B | 123.79(13) |
| O26B-N25B-C17B | 119.51(12) |
| O27B-N25B-C17B | 116.67(13) |
| N1A-C2A-C3A    | 108.42(12) |
| N1A-C2A-H2AA   | 110.0      |
| C3A-C2A-H2AA   | 110.0      |
| N1A-C2A-H2AB   | 110.0      |
| C3A-C2A-H2AB   | 110.0      |
| H2AA-C2A-H2AB  | 108.4      |
| N1B-C2B-C3B    | 108.94(11) |
| N1B-C2B-H2BA   | 109.9      |
| C3B-C2B-H2BA   | 109.9      |
| N1B-C2B-H2BB   | 109.9      |
| C3B-C2B-H2BB   | 109.9      |
| H2BA-C2B-H2BB  | 108.3      |
| C4A-C3A-C2A    | 110.44(13) |
| C4A-C3A-H3AA   | 109.6      |
| C2A-C3A-H3AA   | 109.6      |
| C4A-C3A-H3AB   | 109.6      |
| C2A-C3A-H3AB   | 109.6      |
| H3AA-C3A-H3AB  | 108.1      |
| C4B-C3B-C2B    | 110.81(12) |
| C4B-C3B-H3BA   | 109.5      |
| C2B-C3B-H3BA   | 109.5      |
| C4B-C3B-H3BB   | 109.5      |
| C2B-C3B-H3BB   | 109.5      |

|               |            |
|---------------|------------|
| H3BA-C3B-H3BB | 108.1      |
| C9A-C4A-C5A   | 119.36(15) |
| C9A-C4A-C3A   | 120.22(13) |
| C5A-C4A-C3A   | 120.41(13) |
| C9B-C4B-C5B   | 118.87(14) |
| C9B-C4B-C3B   | 120.92(13) |
| C5B-C4B-C3B   | 120.20(13) |
| C6A-C5A-C4A   | 121.16(15) |
| C6A-C5A-H5AA  | 119.4      |
| C4A-C5A-H5AA  | 119.4      |
| C6B-C5B-C4B   | 121.43(14) |
| C6B-C5B-H5BA  | 119.3      |
| C4B-C5B-H5BA  | 119.3      |
| C5A-C6A-C7A   | 119.82(15) |
| C5A-C6A-H6AA  | 120.1      |
| C7A-C6A-H6AA  | 120.1      |
| C5B-C6B-C7B   | 119.82(14) |
| C5B-C6B-H6BA  | 120.1      |
| C7B-C6B-H6BA  | 120.1      |
| C8A-C7A-C6A   | 119.52(15) |
| C8A-C7A-H7AA  | 120.2      |
| C6A-C7A-H7AA  | 120.2      |
| C8B-C7B-C6B   | 119.28(15) |
| C8B-C7B-H7BA  | 120.4      |
| C6B-C7B-H7BA  | 120.4      |
| C7A-C8A-C9A   | 121.17(14) |
| C7A-C8A-H8AA  | 119.4      |
| C9A-C8A-H8AA  | 119.4      |
| C7B-C8B-C9B   | 121.25(14) |
| C7B-C8B-H8BA  | 119.4      |
| C9B-C8B-H8BA  | 119.4      |
| C4A-C9A-C8A   | 118.97(14) |
| C4A-C9A-C10A  | 122.39(13) |
| C8A-C9A-C10A  | 118.56(12) |
| C4B-C9B-C8B   | 119.33(13) |
| C4B-C9B-C10B  | 122.06(13) |

|                |            |
|----------------|------------|
| C8B-C9B-C10B   | 118.48(12) |
| N1A-C10A-C9A   | 110.85(11) |
| N1A-C10A-C11A  | 112.35(11) |
| C9A-C10A-C11A  | 108.58(12) |
| N1A-C10A-C17A  | 106.03(12) |
| C9A-C10A-C17A  | 109.44(11) |
| C11A-C10A-C17A | 109.54(11) |
| N1B-C10B-C9B   | 110.81(11) |
| N1B-C10B-C11B  | 112.83(11) |
| C9B-C10B-C11B  | 107.98(11) |
| N1B-C10B-C17B  | 106.33(11) |
| C9B-C10B-C17B  | 109.88(11) |
| C11B-C10B-C17B | 108.99(11) |
| C16A-C11A-C12A | 117.66(13) |
| C16A-C11A-C10A | 123.20(13) |
| C12A-C11A-C10A | 119.09(12) |
| C16B-C11B-C12B | 117.56(13) |
| C16B-C11B-C10B | 123.63(13) |
| C12B-C11B-C10B | 118.79(12) |
| C13A-C12A-C11A | 121.21(14) |
| C13A-C12A-H12A | 119.4      |
| C11A-C12A-H12A | 119.4      |
| C13B-C12B-C11B | 121.48(14) |
| C13B-C12B-H12B | 119.3      |
| C11B-C12B-H12B | 119.3      |
| C12A-C13A-C14A | 120.28(15) |
| C12A-C13A-H13A | 119.9      |
| C14A-C13A-H13A | 119.9      |
| C14B-C13B-C12B | 120.04(15) |
| C14B-C13B-H13B | 120.0      |
| C12B-C13B-H13B | 120.0      |
| C15A-C14A-C13A | 119.25(15) |
| C15A-C14A-H14A | 120.4      |
| C13A-C14A-H14A | 120.4      |
| C15B-C14B-C13B | 119.29(14) |
| C15B-C14B-H14B | 120.4      |

|                |            |
|----------------|------------|
| C13B-C14B-H14B | 120.4      |
| C14A-C15A-C16A | 120.42(15) |
| C14A-C15A-H15A | 119.8      |
| C16A-C15A-H15A | 119.8      |
| C14B-C15B-C16B | 120.60(15) |
| C14B-C15B-H15B | 119.7      |
| C16B-C15B-H15B | 119.7      |
| C15A-C16A-C11A | 121.17(14) |
| C15A-C16A-H16A | 119.4      |
| C11A-C16A-H16A | 119.4      |
| C15B-C16B-C11B | 121.02(14) |
| C15B-C16B-H16B | 119.5      |
| C11B-C16B-H16B | 119.5      |
| C18A-C17A-N25A | 107.56(11) |
| C18A-C17A-C10A | 114.65(12) |
| N25A-C17A-C10A | 110.41(11) |
| C18A-C17A-H17A | 108.0      |
| N25A-C17A-H17A | 108.0      |
| C10A-C17A-H17A | 108.0      |
| C18B-C17B-N25B | 107.86(11) |
| C18B-C17B-C10B | 114.45(12) |
| N25B-C17B-C10B | 110.54(11) |
| C18B-C17B-H17B | 107.9      |
| N25B-C17B-H17B | 107.9      |
| C10B-C17B-H17B | 107.9      |
| C23A-C18A-C19A | 120.39(14) |
| C23A-C18A-C17A | 120.58(13) |
| C19A-C18A-C17A | 118.96(14) |
| C23B-C18B-C19B | 119.91(14) |
| C23B-C18B-C17B | 120.66(13) |
| C19B-C18B-C17B | 119.38(14) |
| C20A-C19A-C18A | 120.14(16) |
| C20A-C19A-H19A | 119.9      |
| C18A-C19A-H19A | 119.9      |
| C20B-C19B-C18B | 120.24(15) |
| C20B-C19B-H19B | 119.9      |

|                |            |
|----------------|------------|
| C18B-C19B-H19B | 119.9      |
| C19A-C20A-C21A | 119.66(16) |
| C19A-C20A-H20A | 120.2      |
| C21A-C20A-H20A | 120.2      |
| C19B-C20B-C21B | 120.03(15) |
| C19B-C20B-H20B | 120.0      |
| C21B-C20B-H20B | 120.0      |
| C22A-C21A-C20A | 120.34(15) |
| C22A-C21A-H21A | 119.8      |
| C20A-C21A-H21A | 119.8      |
| C20B-C21B-C22B | 119.90(15) |
| C20B-C21B-H21B | 120.1      |
| C22B-C21B-H21B | 120.1      |
| C21A-C22A-C23A | 120.55(16) |
| C21A-C22A-H22A | 119.7      |
| C23A-C22A-H22A | 119.7      |
| C21B-C22B-C23B | 120.70(15) |
| C21B-C22B-H22B | 119.6      |
| C23B-C22B-H22B | 119.6      |
| C18A-C23A-C22A | 118.91(15) |
| C18A-C23A-C24A | 120.93(13) |
| C22A-C23A-C24A | 120.15(15) |
| C18B-C23B-C22B | 119.21(14) |
| C18B-C23B-C24B | 120.78(13) |
| C22B-C23B-C24B | 119.97(14) |
| N1A-C24A-C23A  | 110.91(12) |
| N1A-C24A-H24A  | 109.5      |
| C23A-C24A-H24A | 109.5      |
| N1A-C24A-H24B  | 109.5      |
| C23A-C24A-H24B | 109.5      |
| H24A-C24A-H24B | 108.0      |
| N1B-C24B-C23B  | 111.25(12) |
| N1B-C24B-H24C  | 109.4      |
| C23B-C24B-H24C | 109.4      |
| N1B-C24B-H24D  | 109.4      |
| C23B-C24B-H24D | 109.4      |

---

Symmetry transformations used to generate equivalent atoms:

**Supplementary Table 4.** Anisotropic displacement parameters ( $\text{\AA}^2 \times 10^3$ ) for rick1. The anisotropic displacement factor exponent takes the form:  $-2p^2 [ h^2 a^{*2} U^{11} + \dots + 2 h k a^* b^* U^{12} ]$

---

|      | U11   | U22   | U33   | U23    | U13   | U12   |
|------|-------|-------|-------|--------|-------|-------|
| O26A | 25(1) | 20(1) | 27(1) | -1(1)  | -3(1) | -3(1) |
| O26B | 32(1) | 20(1) | 24(1) | 1(1)   | -1(1) | -7(1) |
| O27A | 30(1) | 36(1) | 25(1) | -10(1) | 5(1)  | -2(1) |
| O27B | 36(1) | 34(1) | 34(1) | -16(1) | 13(1) | -5(1) |
| N1A  | 17(1) | 18(1) | 20(1) | 1(1)   | 3(1)  | 1(1)  |
| N1B  | 14(1) | 18(1) | 17(1) | 1(1)   | 2(1)  | 2(1)  |
| N25A | 17(1) | 21(1) | 21(1) | -2(1)  | -3(1) | 2(1)  |
| N25B | 20(1) | 18(1) | 19(1) | -2(1)  | -1(1) | 1(1)  |
| C2A  | 25(1) | 23(1) | 19(1) | 2(1)   | 6(1)  | 0(1)  |
| C2B  | 19(1) | 20(1) | 16(1) | 0(1)   | 2(1)  | 1(1)  |
| C3A  | 29(1) | 21(1) | 25(1) | 7(1)   | 6(1)  | 1(1)  |
| C3B  | 21(1) | 17(1) | 20(1) | 2(1)   | 2(1)  | 0(1)  |
| C4A  | 22(1) | 18(1) | 18(1) | 1(1)   | -1(1) | 0(1)  |
| C4B  | 18(1) | 16(1) | 17(1) | 0(1)   | -2(1) | 0(1)  |
| C5A  | 30(1) | 19(1) | 23(1) | 3(1)   | -4(1) | 3(1)  |
| C5B  | 22(1) | 16(1) | 22(1) | 0(1)   | -3(1) | 2(1)  |
| C6A  | 25(1) | 23(1) | 27(1) | 1(1)   | -5(1) | 6(1)  |
| C6B  | 21(1) | 19(1) | 27(1) | -4(1)  | -5(1) | 5(1)  |
| C7A  | 19(1) | 26(1) | 25(1) | -1(1)  | -1(1) | 3(1)  |
| C7B  | 16(1) | 22(1) | 28(1) | -4(1)  | 0(1)  | 3(1)  |
| C8A  | 17(1) | 20(1) | 21(1) | 2(1)   | -1(1) | 0(1)  |
| C8B  | 17(1) | 18(1) | 24(1) | 0(1)   | 1(1)  | 0(1)  |
| C9A  | 18(1) | 17(1) | 16(1) | 0(1)   | -2(1) | 1(1)  |
| C9B  | 14(1) | 15(1) | 18(1) | -2(1)  | -1(1) | 1(1)  |
| C10A | 16(1) | 16(1) | 16(1) | 1(1)   | 0(1)  | 0(1)  |
| C10B | 14(1) | 15(1) | 16(1) | 0(1)   | 0(1)  | 2(1)  |

|      |       |       |       |       |        |       |
|------|-------|-------|-------|-------|--------|-------|
| C11A | 16(1) | 16(1) | 18(1) | 1(1)  | -1(1)  | -1(1) |
| C11B | 14(1) | 17(1) | 19(1) | -2(1) | 0(1)   | 1(1)  |
| C12A | 25(1) | 20(1) | 18(1) | 2(1)  | -3(1)  | -2(1) |
| C12B | 22(1) | 20(1) | 21(1) | -1(1) | -2(1)  | -2(1) |
| C13A | 34(1) | 26(1) | 19(1) | 0(1)  | -7(1)  | -5(1) |
| C13B | 23(1) | 25(1) | 24(1) | -5(1) | -3(1)  | -5(1) |
| C14A | 37(1) | 21(1) | 28(1) | -3(1) | -7(1)  | -6(1) |
| C14B | 23(1) | 20(1) | 32(1) | -8(1) | -1(1)  | -2(1) |
| C15A | 29(1) | 18(1) | 32(1) | 1(1)  | -7(1)  | -2(1) |
| C15B | 24(1) | 16(1) | 37(1) | -1(1) | -4(1)  | 2(1)  |
| C16A | 22(1) | 18(1) | 24(1) | 2(1)  | -6(1)  | -1(1) |
| C16B | 20(1) | 17(1) | 27(1) | 0(1)  | -4(1)  | 1(1)  |
| C17A | 17(1) | 17(1) | 17(1) | 0(1)  | -2(1)  | 0(1)  |
| C17B | 16(1) | 15(1) | 17(1) | -1(1) | 0(1)   | 0(1)  |
| C18A | 18(1) | 17(1) | 23(1) | -1(1) | -4(1)  | -1(1) |
| C18B | 18(1) | 16(1) | 19(1) | 1(1)  | -3(1)  | -1(1) |
| C19A | 24(1) | 21(1) | 24(1) | 1(1)  | -7(1)  | -1(1) |
| C19B | 24(1) | 21(1) | 20(1) | 1(1)  | -4(1)  | -1(1) |
| C20A | 28(1) | 21(1) | 32(1) | 3(1)  | -12(1) | -2(1) |
| C20B | 30(1) | 24(1) | 25(1) | 3(1)  | -12(1) | -1(1) |
| C21A | 20(1) | 18(1) | 45(1) | 4(1)  | -10(1) | 1(1)  |
| C21B | 24(1) | 21(1) | 34(1) | 1(1)  | -11(1) | 2(1)  |
| C22A | 18(1) | 20(1) | 38(1) | 1(1)  | -1(1)  | 0(1)  |
| C22B | 17(1) | 19(1) | 30(1) | -1(1) | -4(1)  | 2(1)  |
| C23A | 16(1) | 18(1) | 27(1) | 0(1)  | -2(1)  | -1(1) |
| C23B | 16(1) | 17(1) | 21(1) | -1(1) | -2(1)  | 0(1)  |
| C24A | 18(1) | 22(1) | 26(1) | -1(1) | 3(1)   | 2(1)  |
| C24B | 16(1) | 21(1) | 20(1) | -1(1) | 0(1)   | 3(1)  |

---

**Supplementary Table 5.** Hydrogen coordinates ( $\times 10^4$ ) and isotropic displacement parameters ( $\text{\AA}^2 \times 10^{-3}$ ) for rick1.

|      | x    | y    | z    | U(eq) |
|------|------|------|------|-------|
| H2AA | 1043 | 4181 | 8598 | 27    |
| H2AB | 2984 | 4543 | 8673 | 27    |
| H2BA | 6654 | 5284 | 4156 | 22    |
| H2BB | 8557 | 5678 | 4240 | 22    |
| H3AA | 3205 | 3153 | 8680 | 30    |
| H3AB | 2210 | 3097 | 8181 | 30    |
| H3BA | 7285 | 6800 | 4579 | 23    |
| H3BB | 6314 | 6652 | 4083 | 23    |
| H5AA | 5839 | 2468 | 8374 | 29    |
| H5BA | 3676 | 7375 | 4358 | 24    |
| H6AA | 8566 | 2579 | 8001 | 30    |
| H6BA | 929  | 7299 | 4723 | 27    |
| H7AA | 9160 | 3675 | 7516 | 28    |
| H7BA | 332  | 6271 | 5259 | 26    |
| H8AA | 7002 | 4645 | 7409 | 23    |
| H8BA | 2503 | 5327 | 5416 | 23    |
| H12A | 5918 | 5043 | 8519 | 25    |
| H12B | 3804 | 4824 | 4287 | 25    |
| H13A | 7114 | 6173 | 8865 | 31    |
| H13B | 2593 | 3674 | 3966 | 29    |
| H14A | 6546 | 7424 | 8540 | 35    |
| H14B | 2894 | 2465 | 4364 | 30    |
| H15A | 4831 | 7525 | 7854 | 32    |
| H15B | 4401 | 2423 | 5085 | 31    |
| H16A | 3649 | 6396 | 7504 | 26    |
| H16B | 5626 | 3571 | 5406 | 25    |
| H17A | 4389 | 5242 | 7094 | 20    |
| H17B | 5041 | 4735 | 5748 | 19    |
| H19A | 2214 | 5566 | 6435 | 28    |
| H19B | 7136 | 4427 | 6428 | 26    |



|      |       |      |      |    |
|------|-------|------|------|----|
| H20A | -317  | 6310 | 6269 | 32 |
| H20B | 9620  | 3674 | 6620 | 32 |
| H21A | -2314 | 6603 | 6876 | 34 |
| H21B | 11739 | 3394 | 6041 | 31 |
| H22A | -1786 | 6162 | 7643 | 30 |
| H22B | 11319 | 3827 | 5265 | 26 |
| H24A | 1292  | 5726 | 8191 | 26 |
| H24B | -293  | 5104 | 8137 | 26 |
| H24C | 9815  | 4794 | 4733 | 22 |
| H24D | 8227  | 4172 | 4692 | 22 |

---

7.46  
7.46  
7.45  
7.45  
7.41  
7.39  
7.39  
7.38  
7.38  
7.37  
7.35  
7.32  
7.31  
7.30  
7.29  
7.28  
7.28  
7.28  
7.27  
7.26  
7.26  
7.25  
7.24  
7.24  
7.23  
7.22  
7.22  
7.21  
7.21  
7.20  
7.20  
7.19  
7.19  
7.19  
7.18  
7.17  
7.16  
7.14  
7.01  
6.99  
6.15  
6.15  
5.90  
5.88  
4.81  
4.79  
4.42  
4.40  
4.40  
4.39  
4.27  
4.24  
4.20  
4.20  
4.20  
3.98  
3.96  
3.79  
3.77  
3.28  
3.28  
3.27  
3.26  
3.26  
3.25  
3.25  
3.23  
3.22  
3.20  
3.03  
3.03  
3.02  
3.02  
3.01  
3.01  
3.00  
3.00  
2.91  
2.90  
2.75  
2.74  
2.73  
2.72  
2.71  
2.70  
2.69

<sup>1</sup>H NMR of (±)-**2a** in CDCl<sub>3</sub>

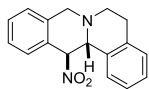

dr = 1.7:1

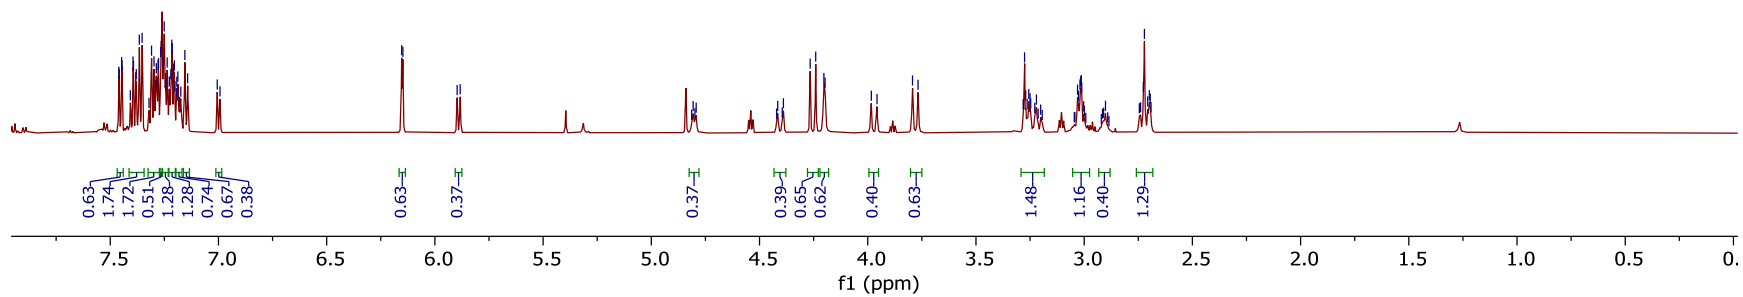

<sup>13</sup>C NMR of (±)-**2a** in CDCl<sub>3</sub>

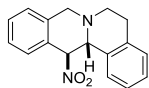

dr = 1.7:1

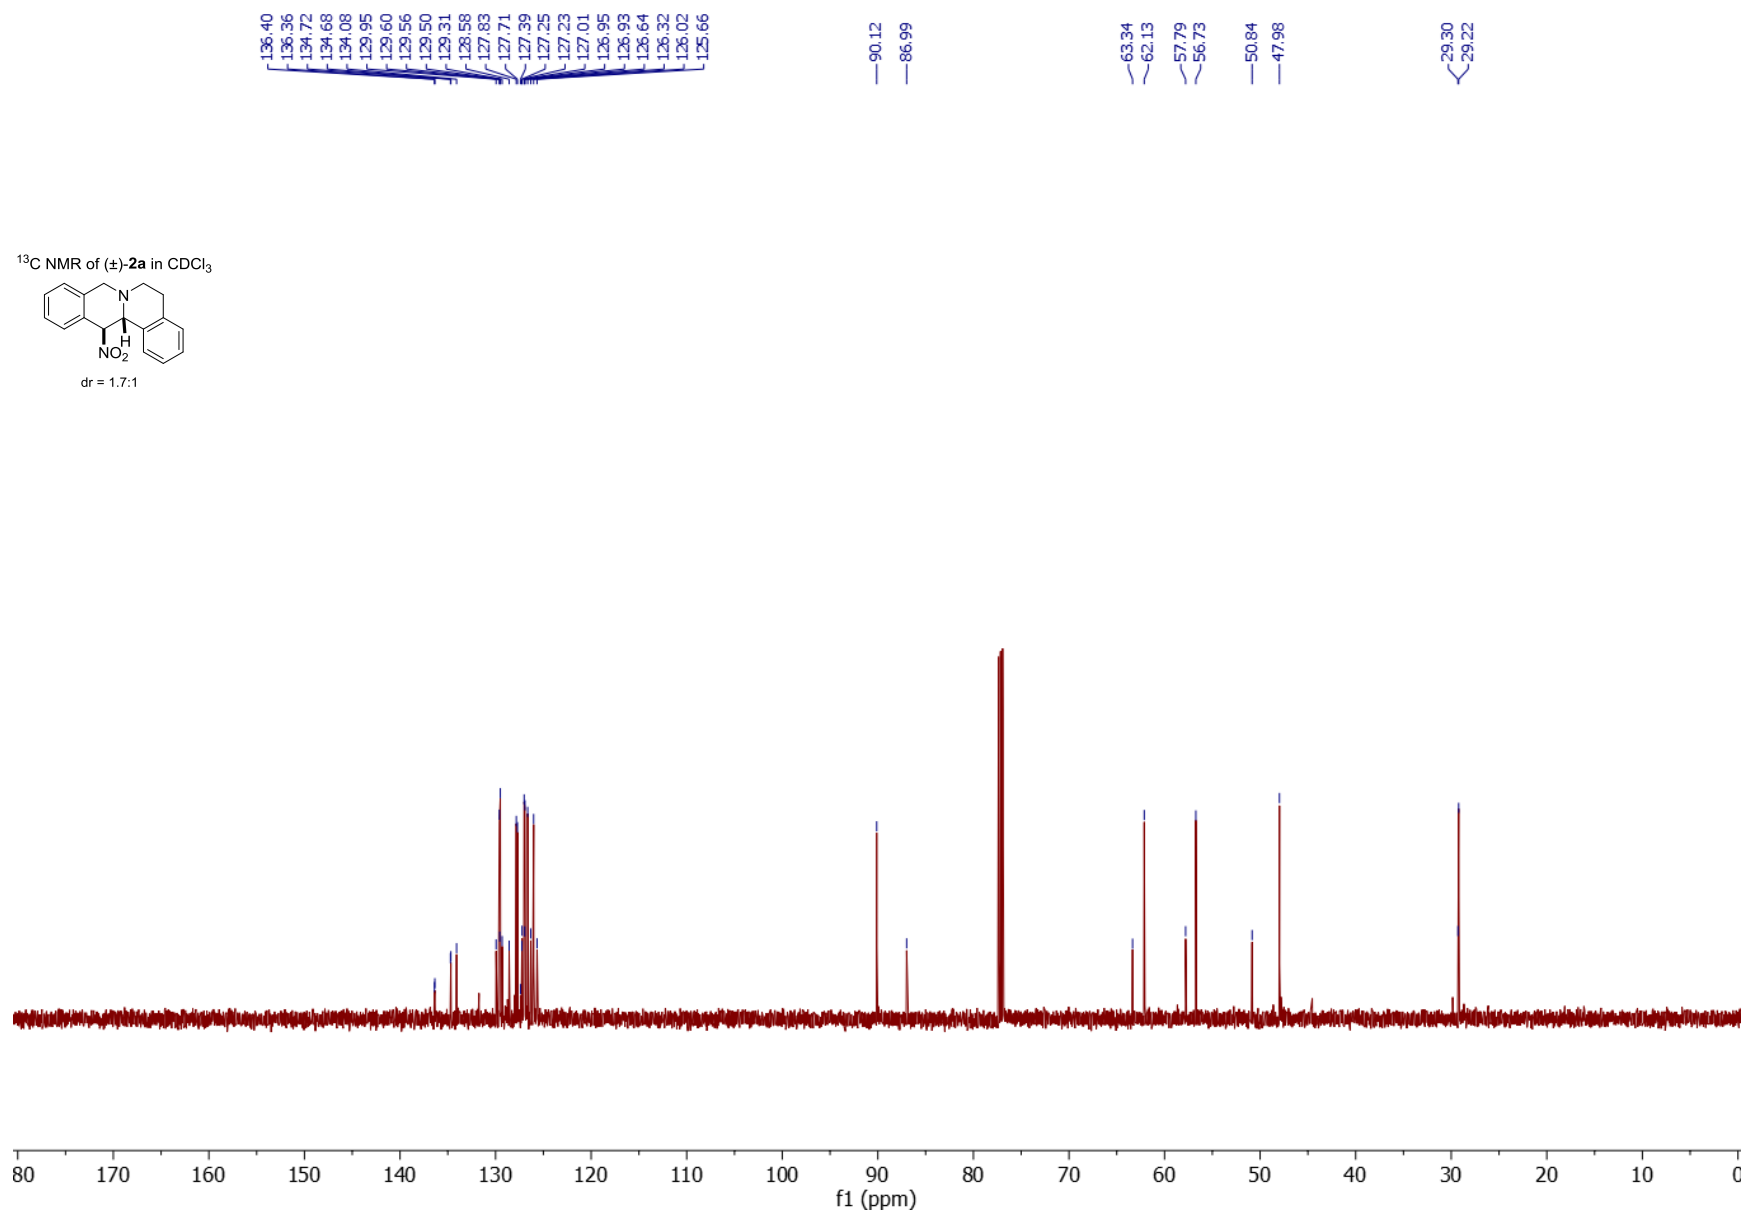

7.58  
7.57  
7.57  
7.56  
7.39  
7.38  
7.37  
7.37  
7.36  
7.36  
7.35  
7.35  
7.34  
7.34  
7.33  
7.32  
7.20  
7.20  
7.20  
7.19  
7.19  
7.19  
7.19  
7.18  
7.18  
7.17  
7.17  
7.17  
7.17  
7.16  
7.16  
7.15  
7.15  
7.14  
7.14  
7.13  
7.12  
7.12  
7.11  
7.11  
7.10  
7.10  
7.03  
7.03  
7.01  
7.01  
6.80  
6.80  
6.79  
6.79  
6.78  
6.58  
3.93  
3.91  
3.37  
3.35  
3.34  
3.34  
3.33  
3.33  
3.31  
3.30  
3.29  
3.28  
3.27  
3.27  
3.05  
3.04  
3.04  
3.03  
3.02  
3.02  
2.87  
2.87  
2.85  
2.85

<sup>1</sup>H NMR of (±)-2e in CDCl<sub>3</sub>

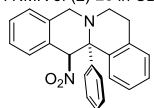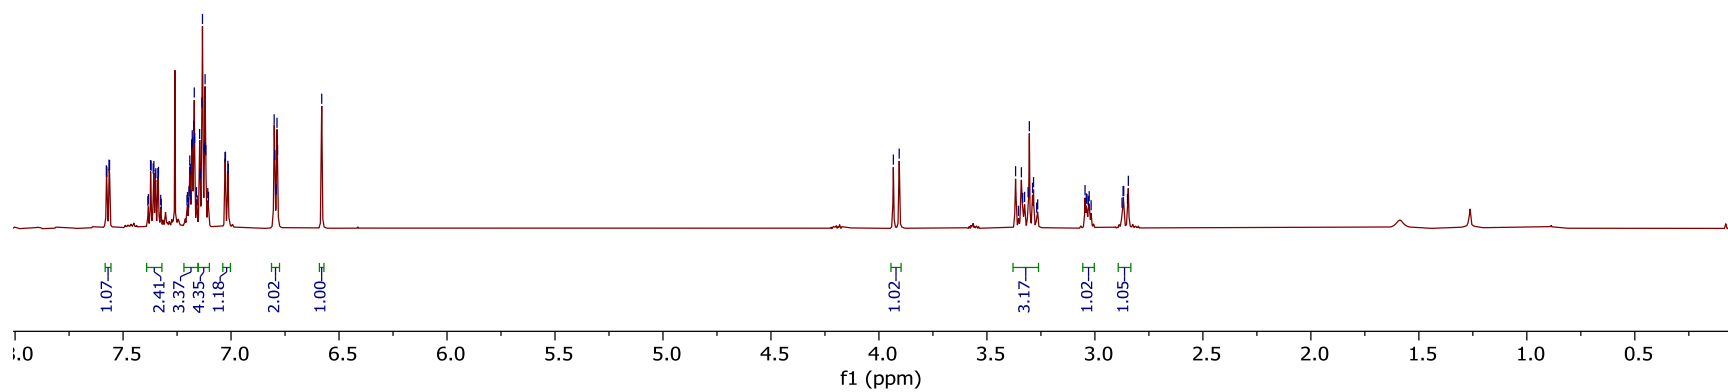

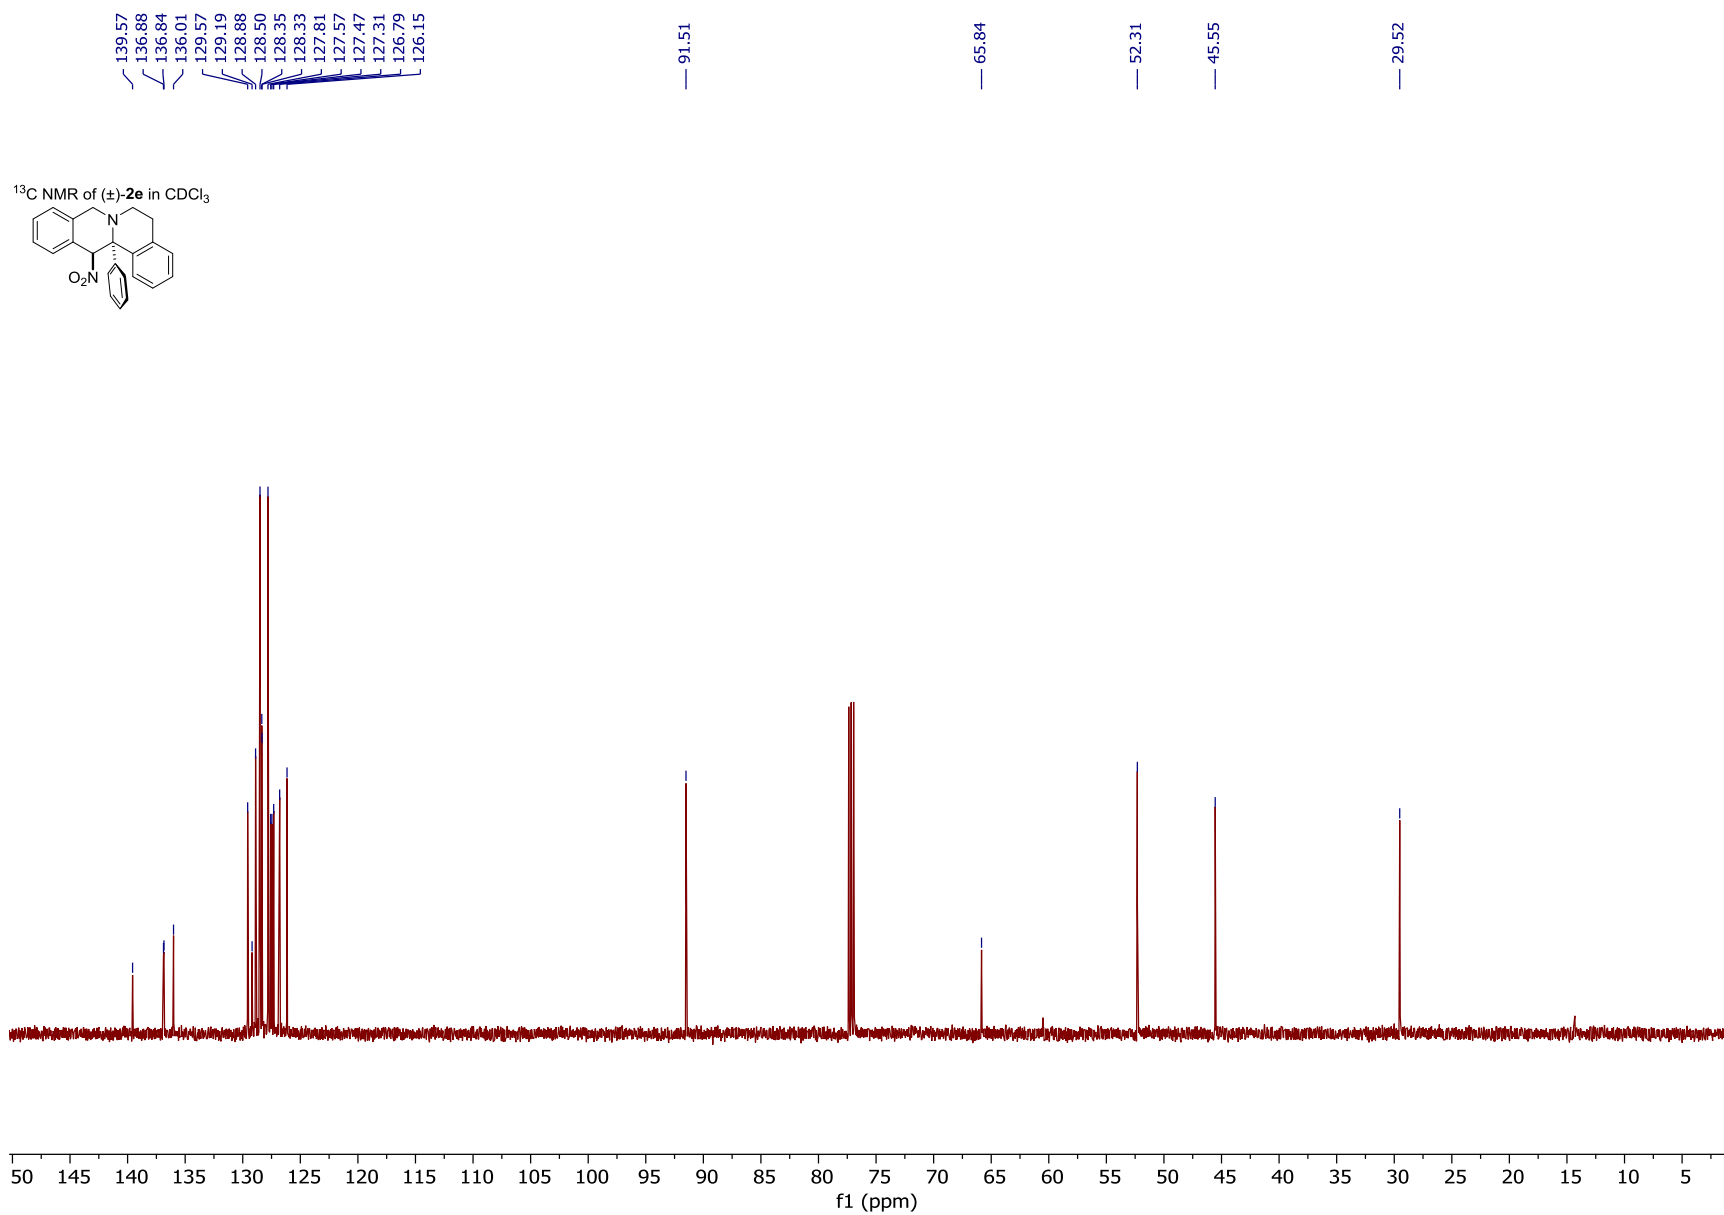

7.57  
7.57  
7.56  
7.56  
7.40  
7.40  
7.39  
7.38  
7.37  
7.37  
7.36  
7.36  
7.35  
7.35  
7.34  
7.34  
7.33  
7.33  
7.21  
7.21  
7.20  
7.20  
7.19  
7.19  
7.19  
7.17  
7.17  
7.16  
7.16  
7.16  
7.15  
7.15  
7.15  
7.14  
7.14  
7.13  
7.13  
7.12  
7.12  
7.12  
7.12  
7.01  
7.01  
7.00  
7.00  
7.00  
6.84  
6.83  
6.83  
6.82  
6.82  
6.81  
6.81  
6.80  
6.80  
6.78  
6.78  
6.77  
6.77  
6.76  
6.76  
6.75  
6.75  
3.95  
3.95  
3.92  
3.92  
3.34  
3.34  
3.33  
3.33  
3.32  
3.31  
3.31  
3.30  
3.30  
3.29  
3.29  
3.23  
3.23  
3.21  
3.21  
3.20  
3.20  
3.19  
3.19  
3.05  
3.05  
3.04  
3.04  
3.03  
3.03  
3.02  
3.02  
2.87  
2.86  
2.86  
2.84  
2.84  
2.83  
2.83

<sup>1</sup>H NMR of (±)-2f in CDCl<sub>3</sub>

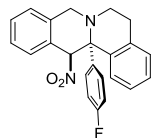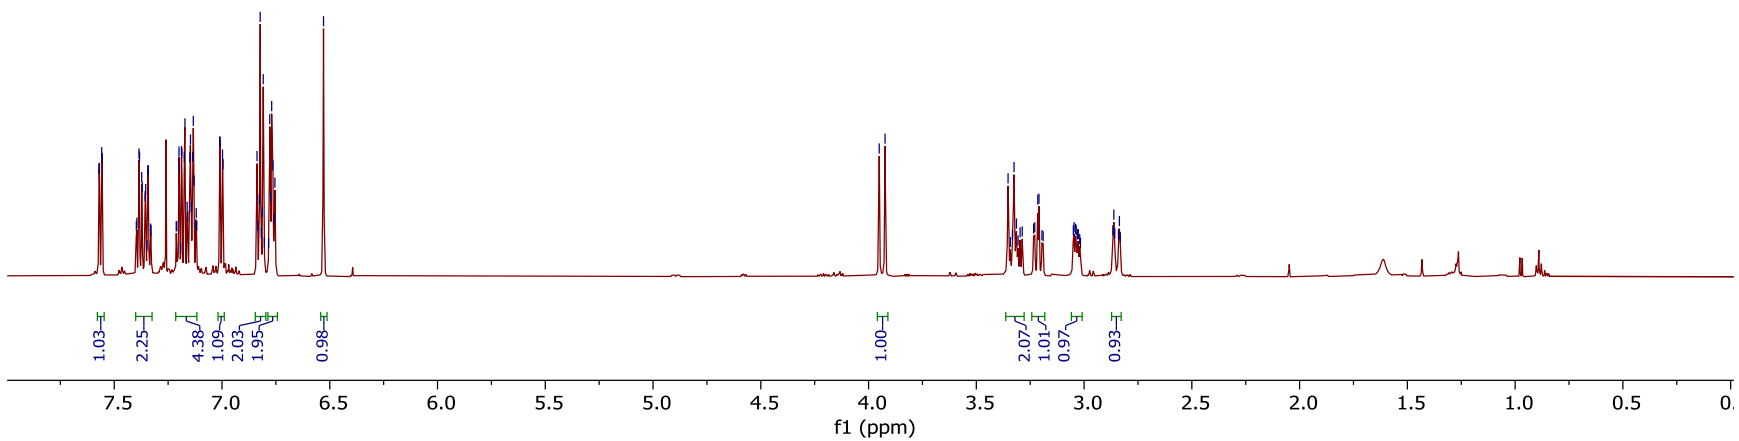

<sup>13</sup>C NMR of (±)-2f in CDCl<sub>3</sub>

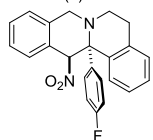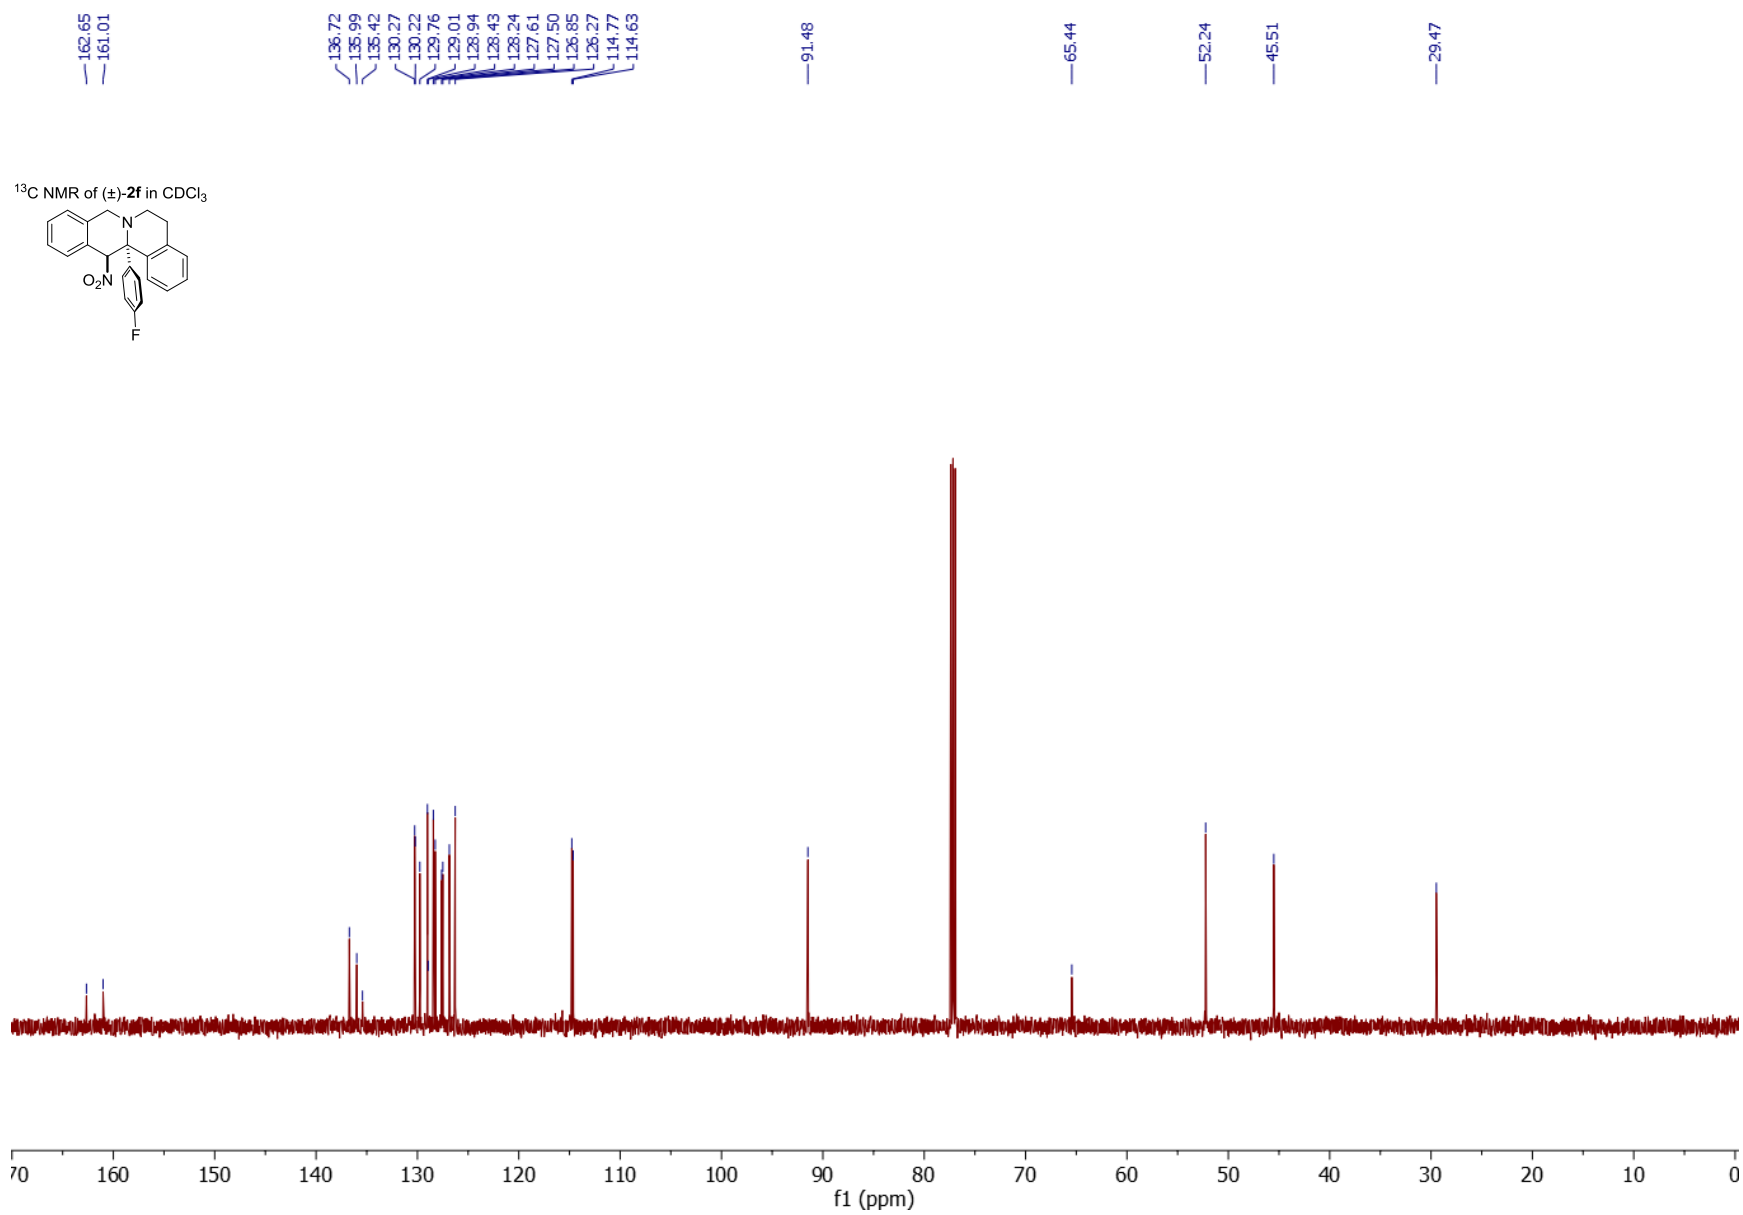

7.57  
7.56  
7.55  
7.55  
7.40  
7.39  
7.38  
7.37  
7.37  
7.36  
7.35  
7.34  
7.34  
7.33  
7.33  
7.21  
7.20  
7.20  
7.19  
7.19  
7.17  
7.16  
7.14  
7.14  
7.13  
7.12  
7.12  
7.11  
7.11  
7.10  
7.10  
7.09  
7.01  
7.00  
7.00  
6.99  
6.99  
6.74  
6.74  
6.73  
6.73  
6.52

3.96  
3.93  
3.37  
3.34  
3.33  
3.32  
3.31  
3.30  
3.29  
3.28  
3.25  
3.24  
3.23  
3.22  
3.21  
3.20  
3.06  
3.05  
3.04  
3.03  
2.86  
2.84

<sup>1</sup>H NMR of (±)-2g in CDCl<sub>3</sub>

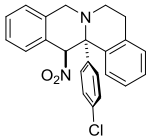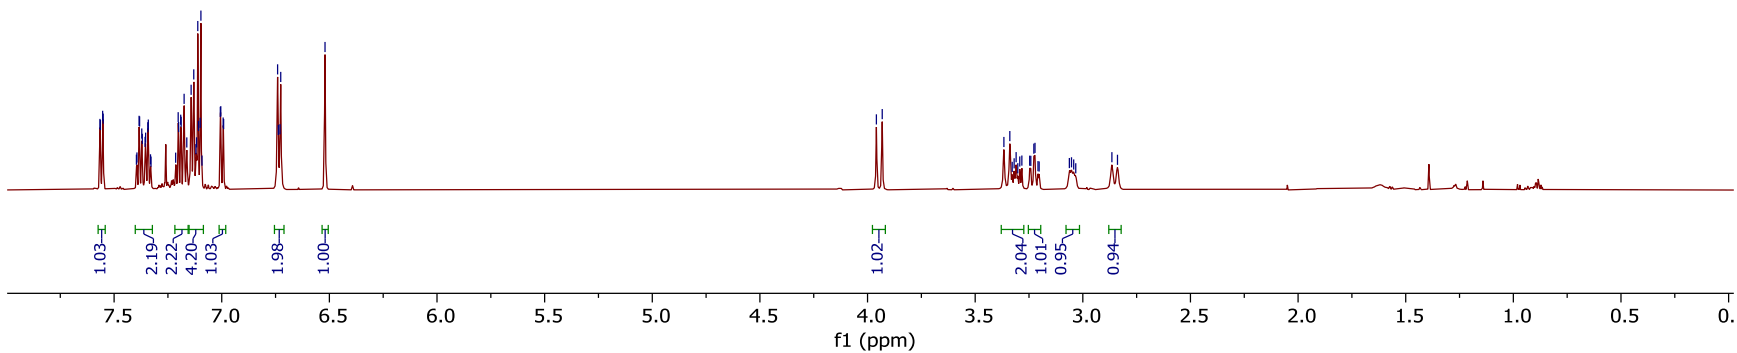



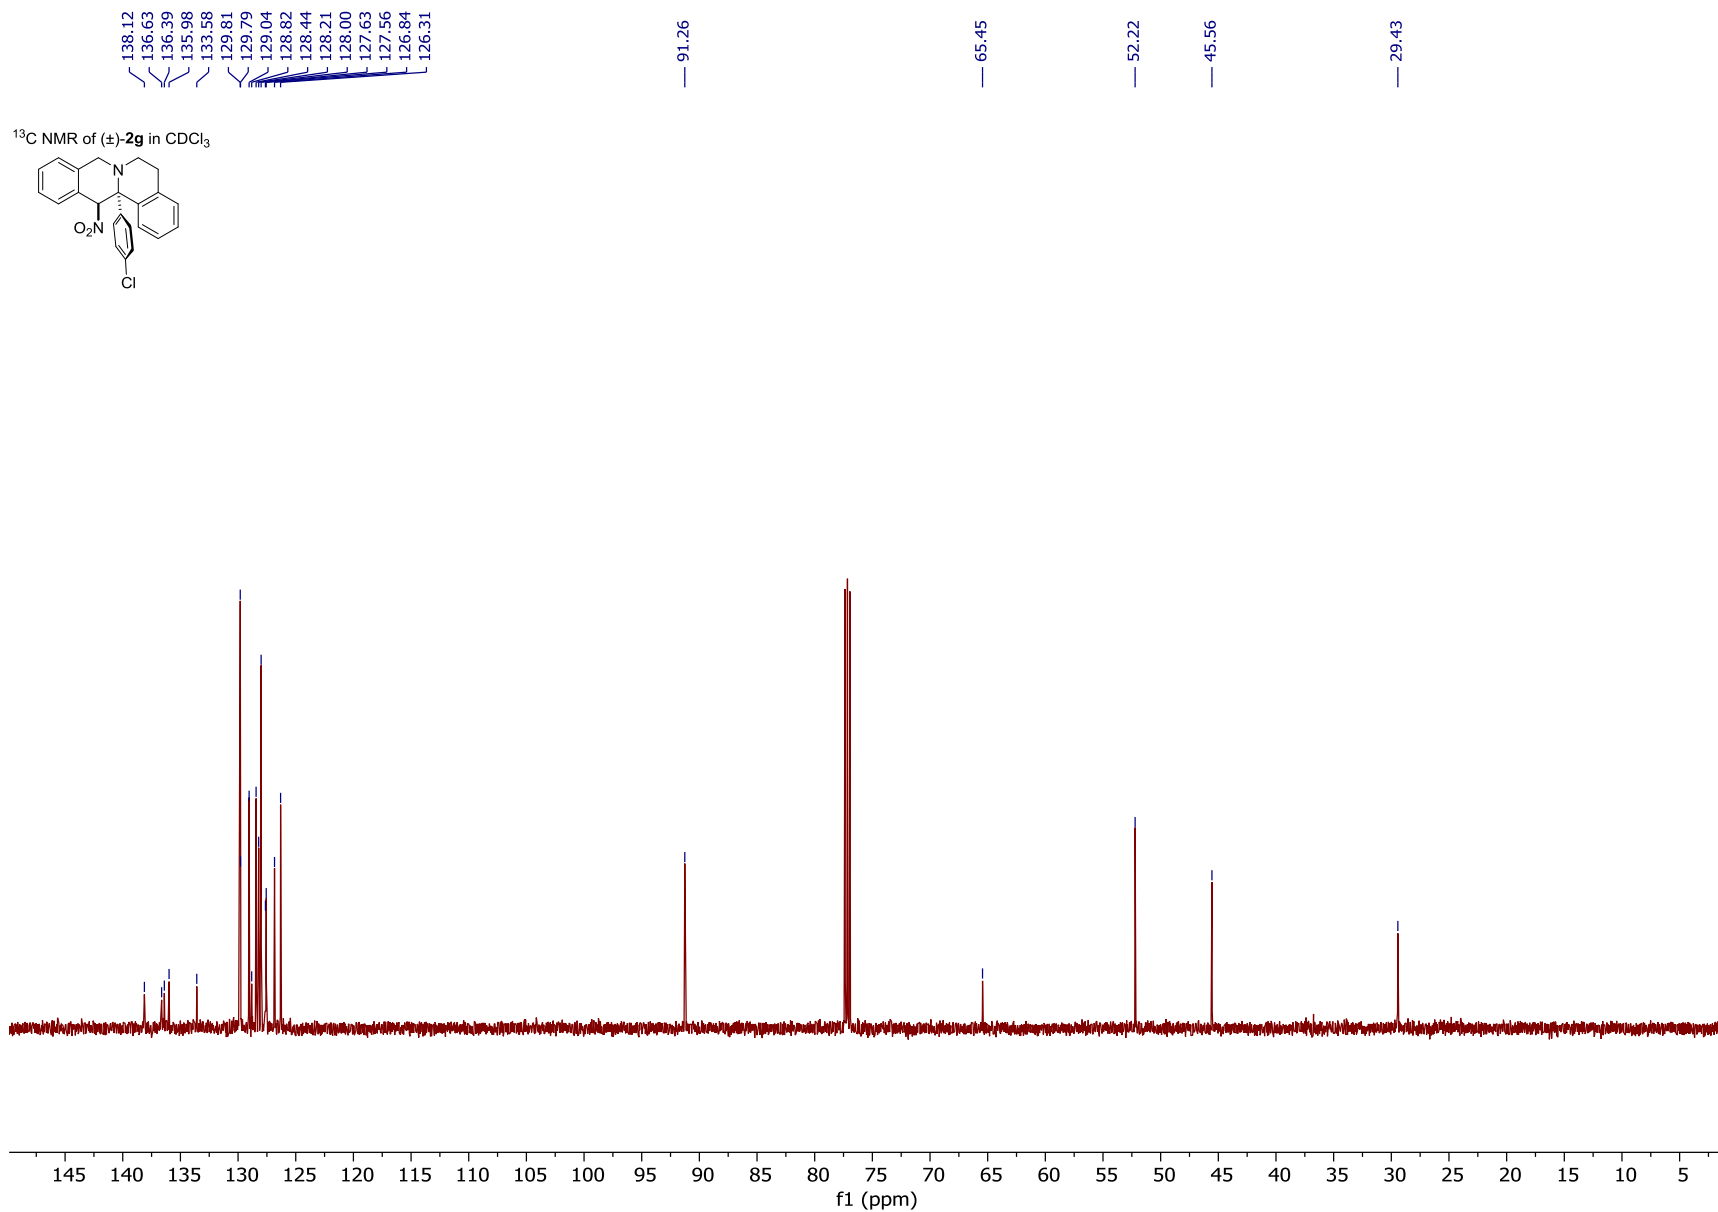

7.56  
7.55  
7.54  
7.54  
7.39  
7.38  
7.38  
7.37  
7.37  
7.35  
7.35  
7.34  
7.34  
7.33  
7.26  
7.25  
7.25  
7.24  
7.20  
7.20  
7.19  
7.18  
7.17  
7.17  
7.16  
7.15  
7.14  
7.14  
7.13  
7.11  
7.11  
6.99  
6.98  
6.98  
6.67  
6.66  
6.51

3.96  
3.93  
3.38  
3.37  
3.34  
3.33  
3.32  
3.31  
3.30  
3.29  
3.28  
3.27  
3.24  
3.23  
3.22  
3.22  
3.20  
3.20  
3.19  
3.07  
3.06  
3.06  
3.05  
3.04  
3.03  
2.87  
2.86  
2.83

<sup>1</sup>H NMR of (±)-2h in CDCl<sub>3</sub>

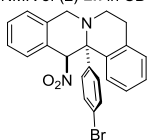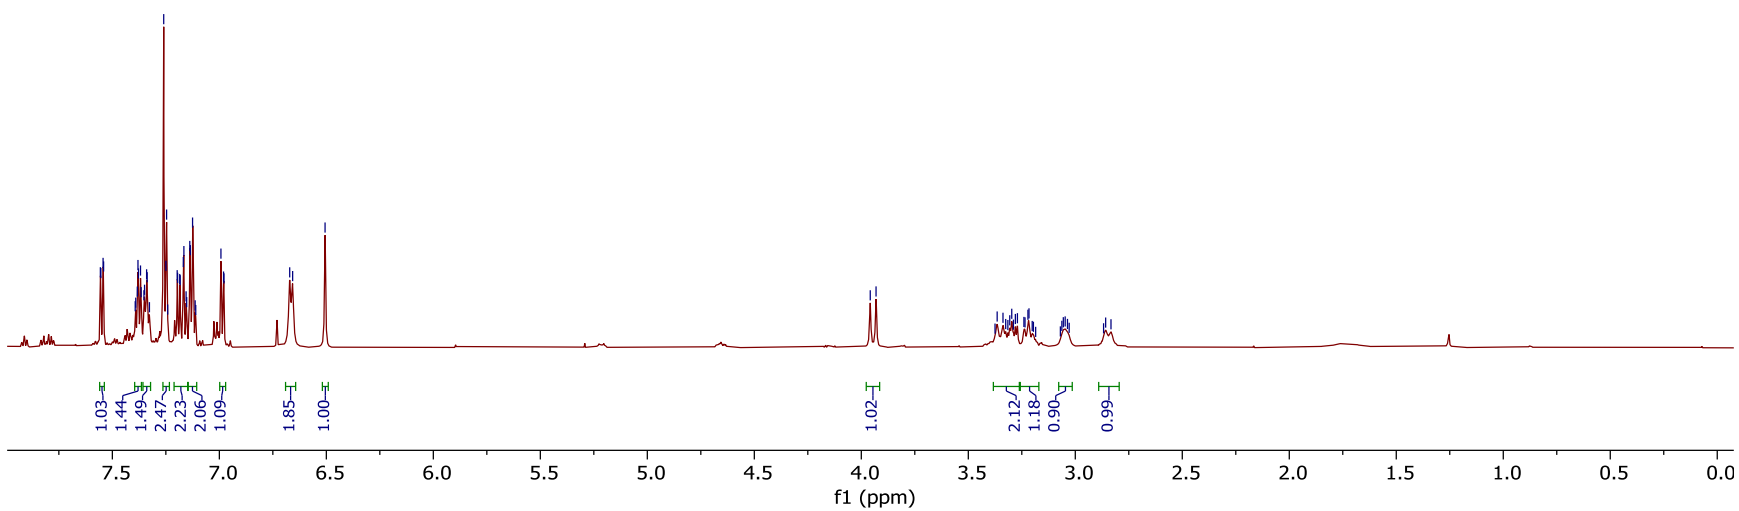

138.64  
136.60  
136.31  
135.97  
130.95  
130.10  
129.78  
129.03  
128.79  
128.42  
128.20  
127.61  
127.55  
126.82  
126.31  
121.81

91.18

65.48

52.20

45.54

29.42

$^{13}\text{C}$  NMR of ( $\pm$ )-**2h** in  $\text{CDCl}_3$

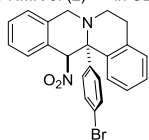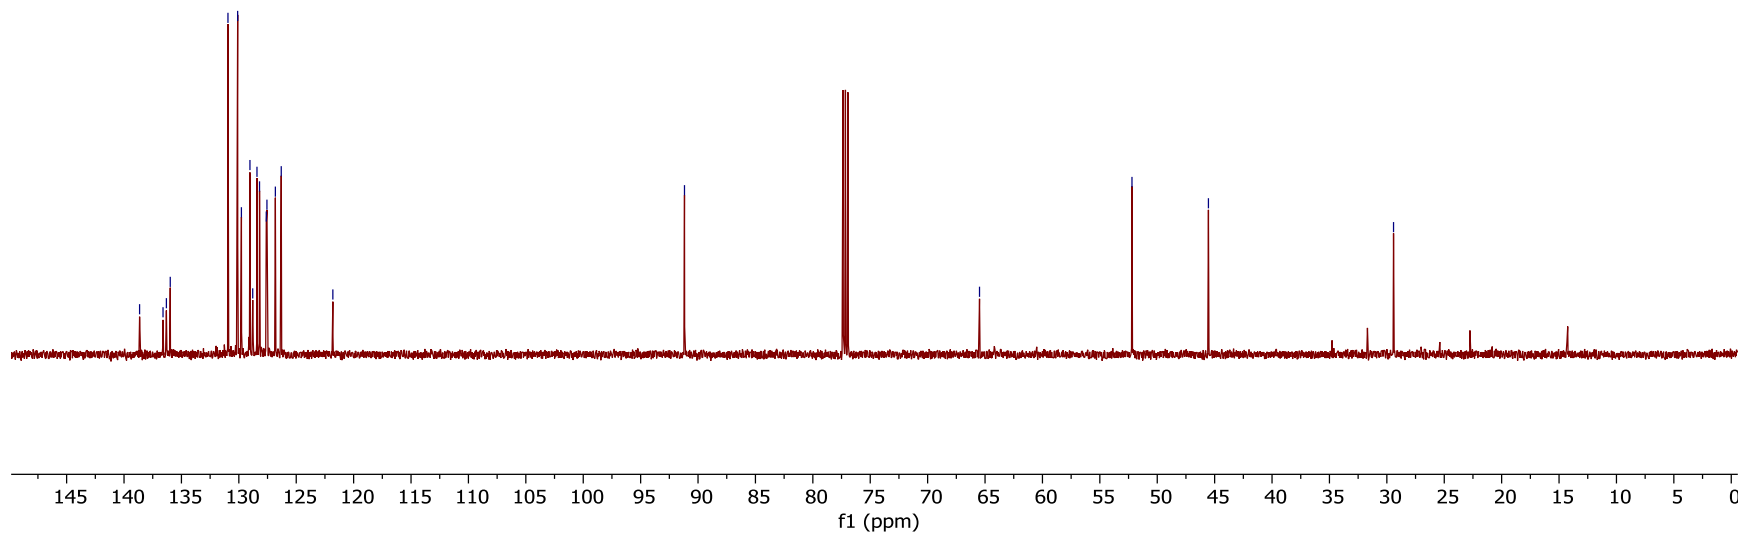

7.58  
7.57  
7.57  
7.57  
7.41  
7.40  
7.39  
7.38  
7.38  
7.37  
7.37  
7.36  
7.36  
7.35  
7.34  
7.34  
7.23  
7.23  
7.22  
7.22  
7.21  
7.21  
7.20  
7.20  
7.19  
7.19  
7.18  
7.15  
7.15  
7.15  
7.14  
7.14  
7.13  
7.13  
7.13  
6.99  
6.99  
6.98  
6.98  
6.95  
6.93  
6.56

3.99  
3.96  
3.36  
3.35  
3.34  
3.33  
3.32  
3.31  
3.30  
3.28  
3.28  
3.27  
3.26  
3.25  
3.24  
3.10  
3.10  
3.08  
3.07  
2.90  
2.87

<sup>1</sup>H NMR of (±)-2i in CDCl<sub>3</sub>

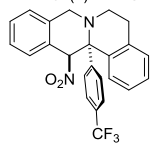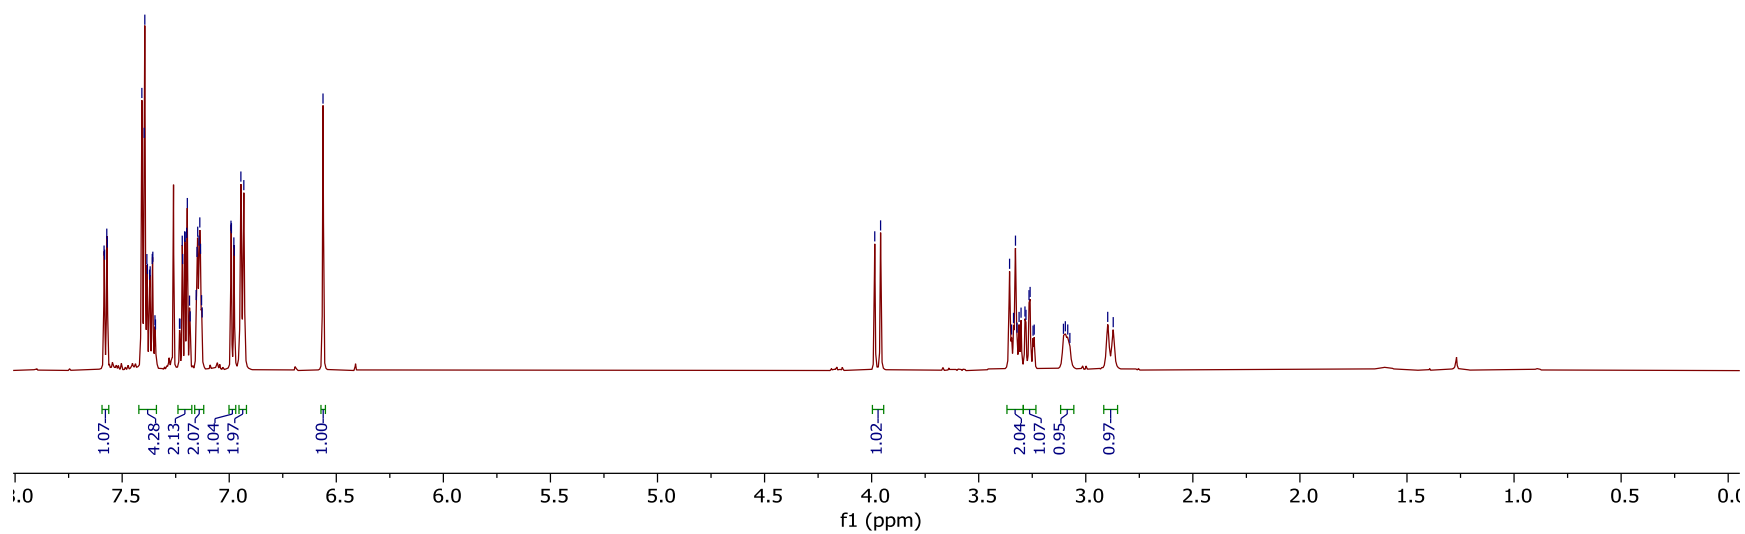

<sup>13</sup>C NMR of (±)-2i in CDCl<sub>3</sub>

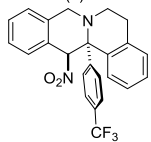

143.68  
136.51  
136.04  
129.89  
129.15  
128.75  
128.71  
128.47  
128.19  
127.71  
126.87  
126.42  
124.81  
124.78  
124.76  
123.01

91.08

65.57

52.20

45.62

29.40

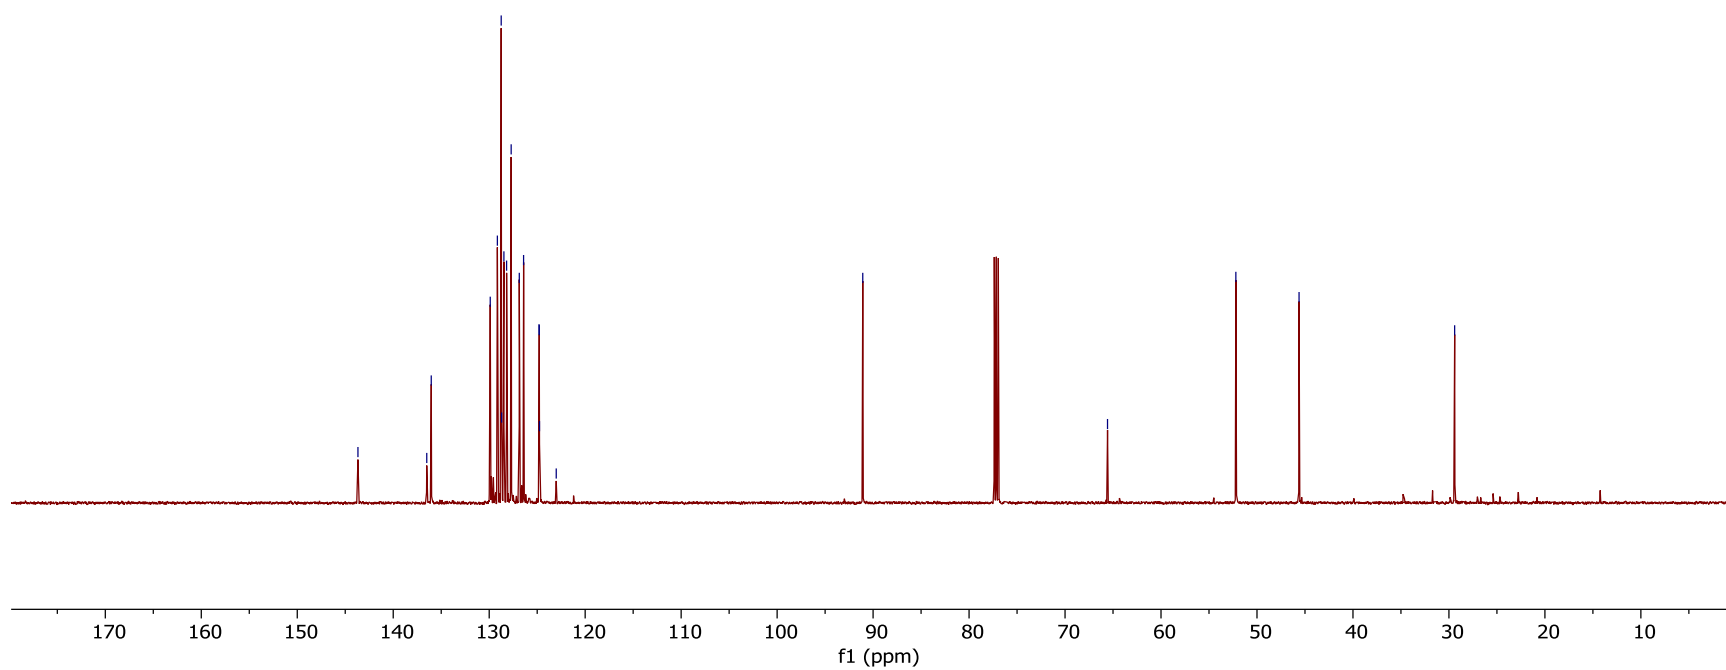

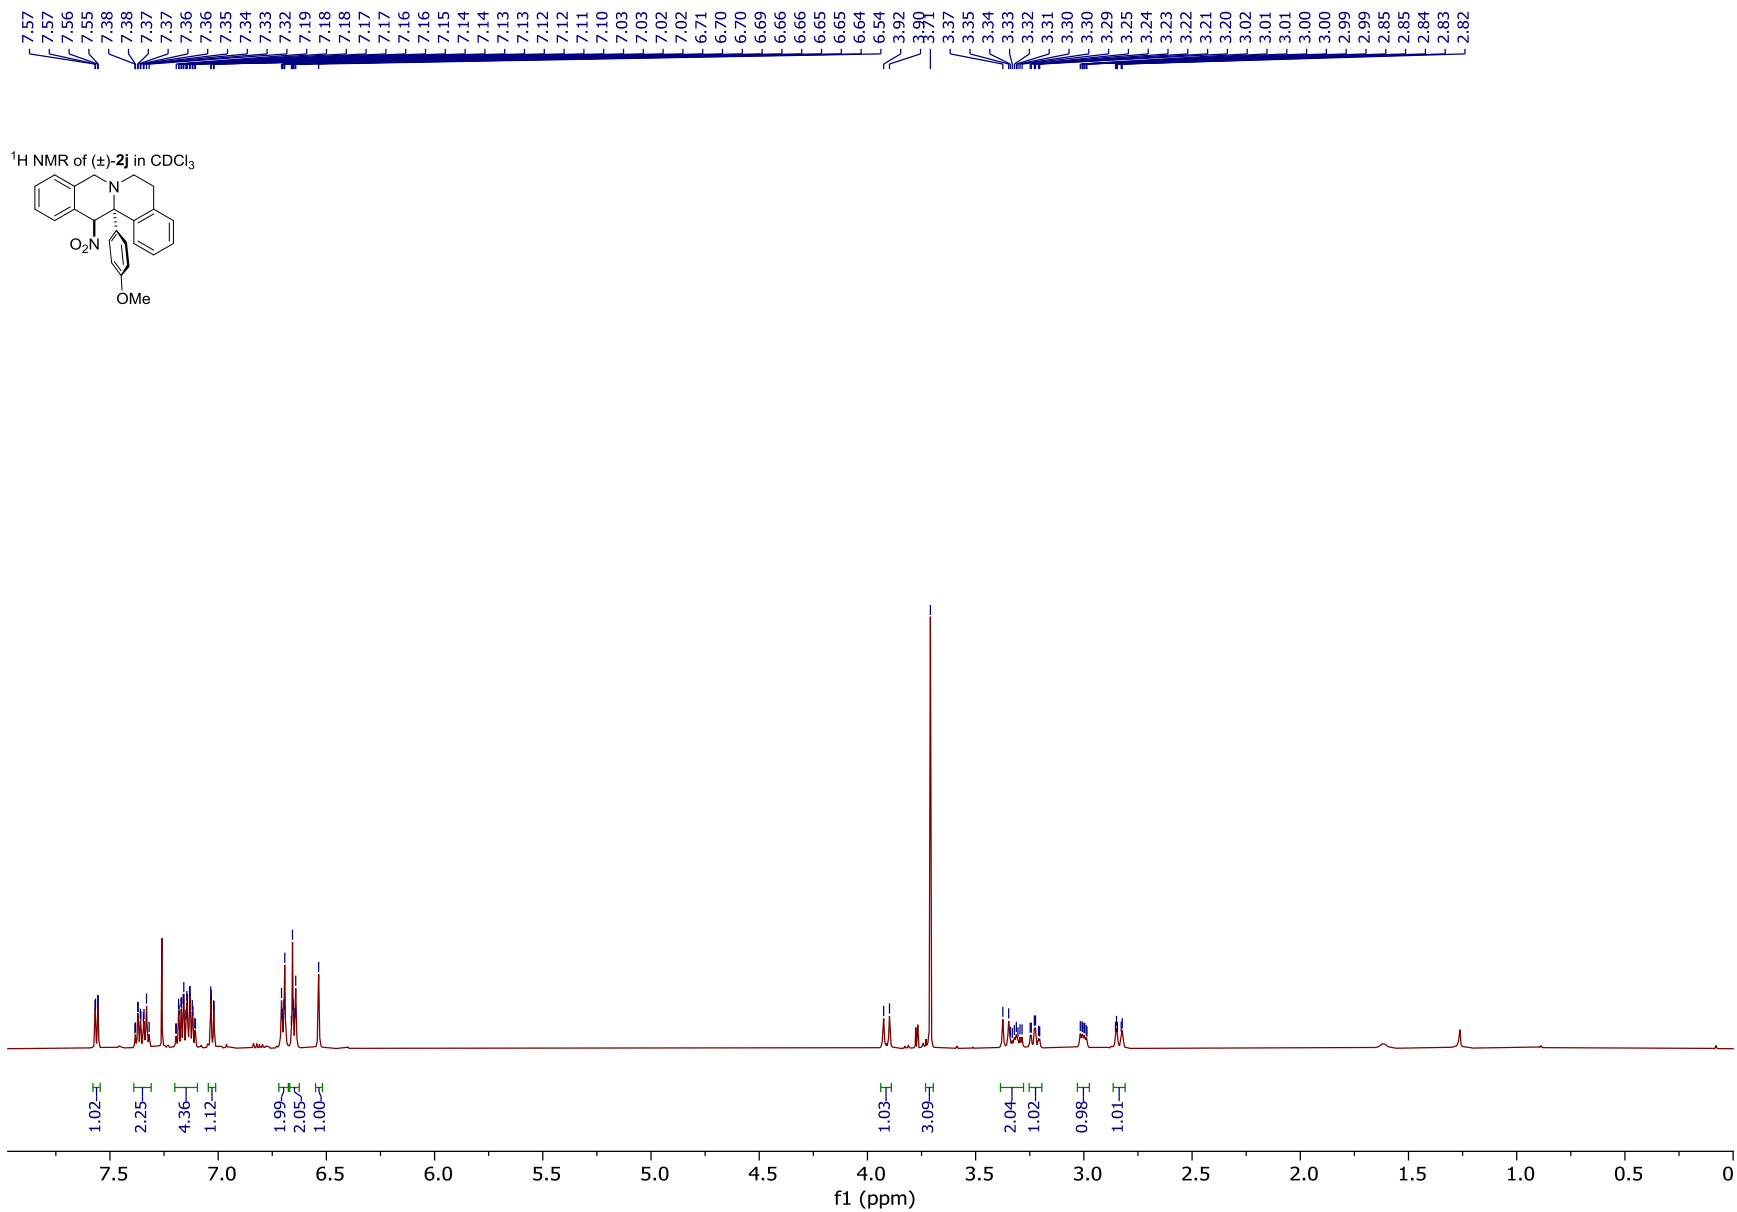

<sup>13</sup>C NMR of (±)-2j in CDCl<sub>3</sub>

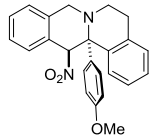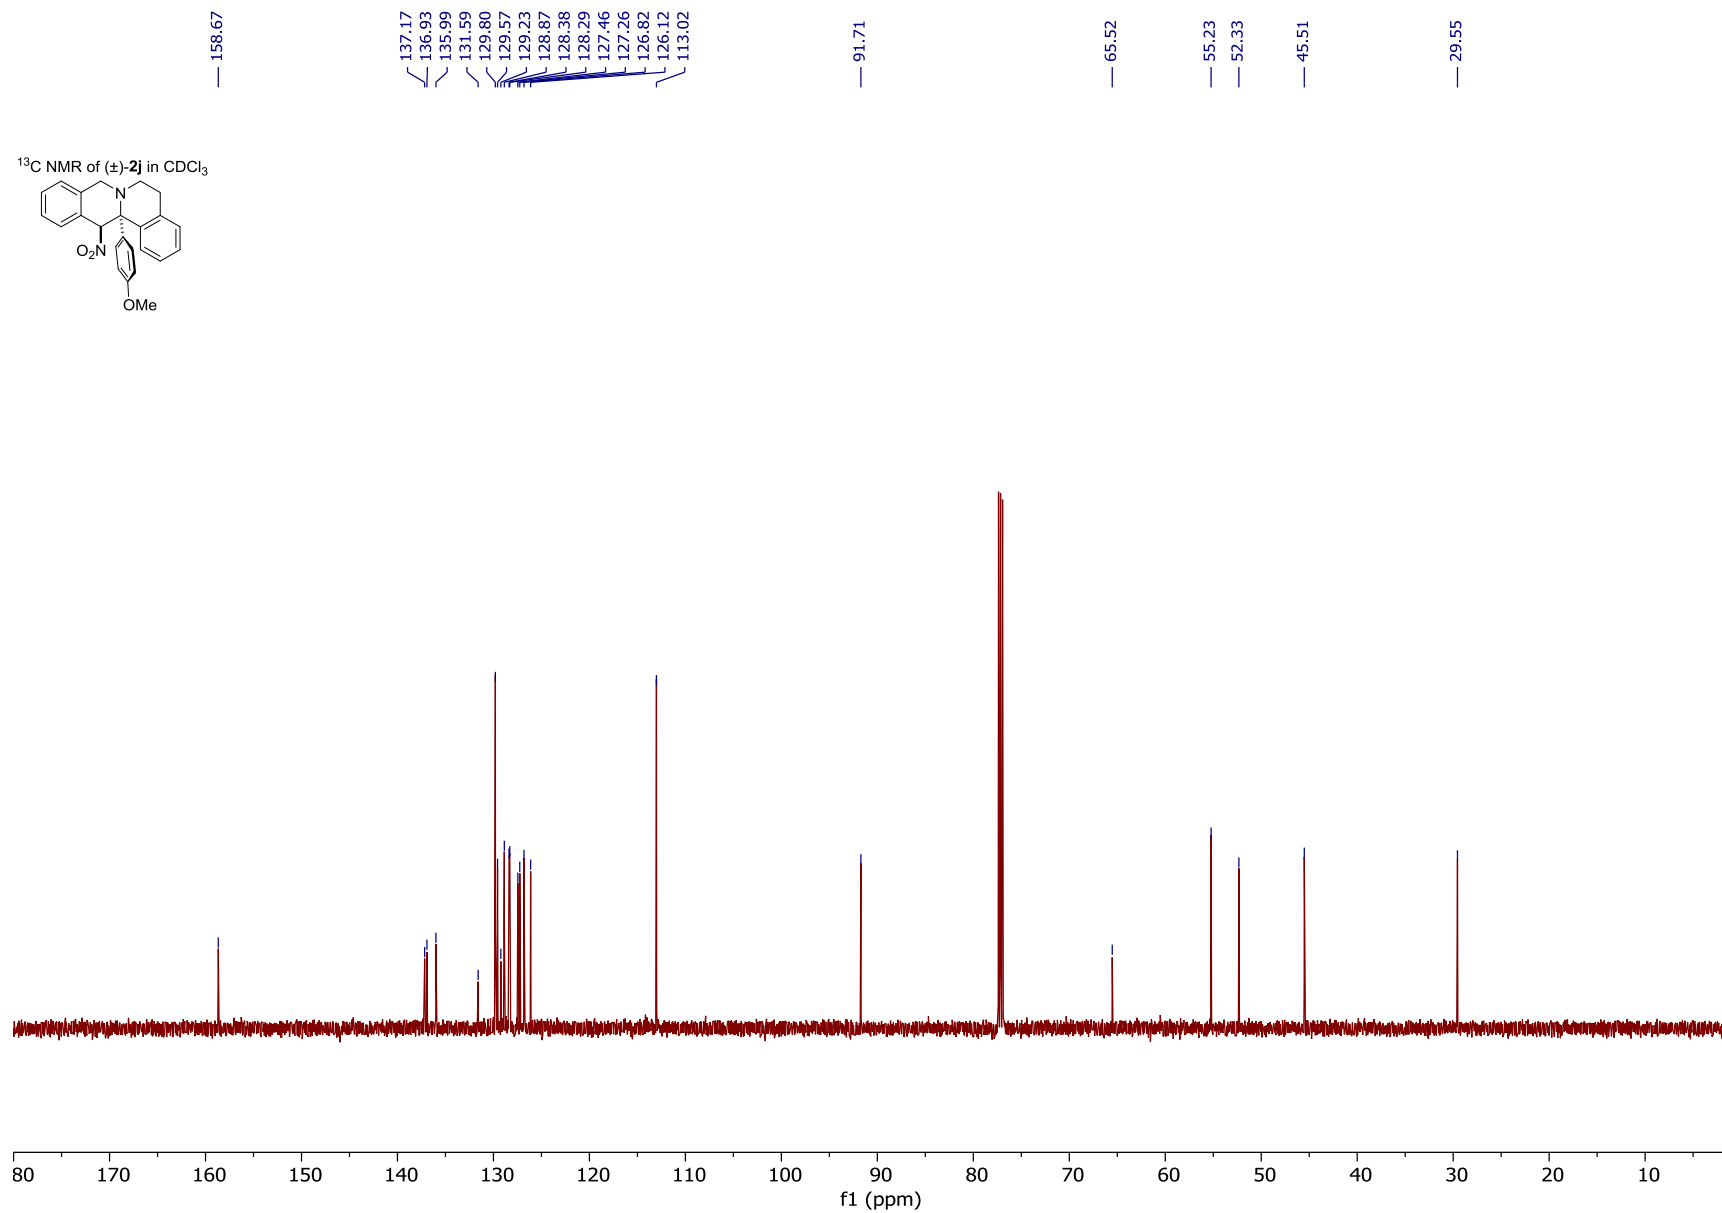

7.57  
7.57  
7.56  
7.56  
7.38  
7.37  
7.37  
7.36  
7.35  
7.35  
7.34  
7.34  
7.33  
7.33  
7.32  
7.26  
7.19  
7.18  
7.18  
7.17  
7.17  
7.16  
7.13  
7.13  
7.13  
7.12  
7.12  
7.11  
7.11  
7.10  
7.04  
7.03  
7.02  
7.02  
6.94  
6.93  
6.68  
6.67  
6.66  
6.56  
3.93  
3.93  
3.35  
3.34  
3.33  
3.32  
3.31  
3.30  
3.29  
3.29  
3.28  
3.27  
3.26  
3.25  
3.03  
3.02  
3.02  
3.01  
3.01  
3.00  
2.87  
2.86  
2.86  
2.84  
2.84  
2.24

<sup>1</sup>H NMR of (±)-2k in CDCl<sub>3</sub>

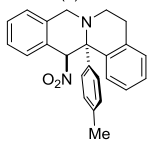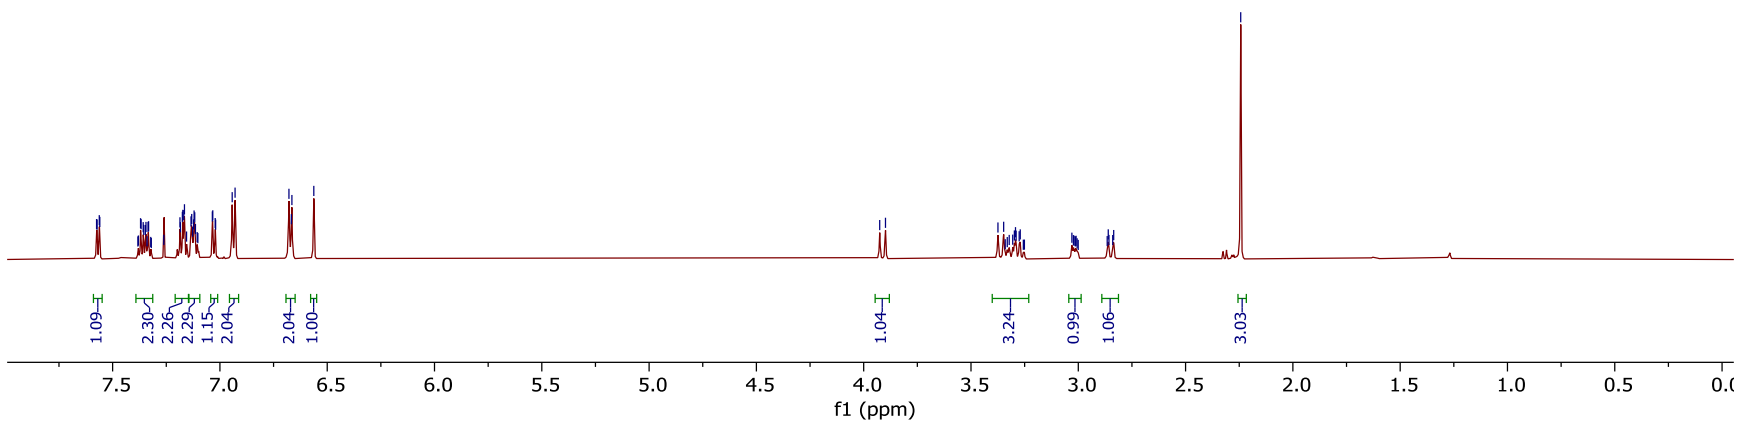



<sup>13</sup>C NMR of (±)-**2k** in CDCl<sub>3</sub>

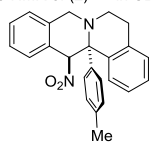

137.32  
137.07  
136.90  
136.54  
135.99  
129.53  
129.26  
128.86  
128.49  
128.46  
128.36  
128.31  
127.43  
127.24  
126.78  
126.13

91.62

65.69

52.34

45.55

29.55

20.96

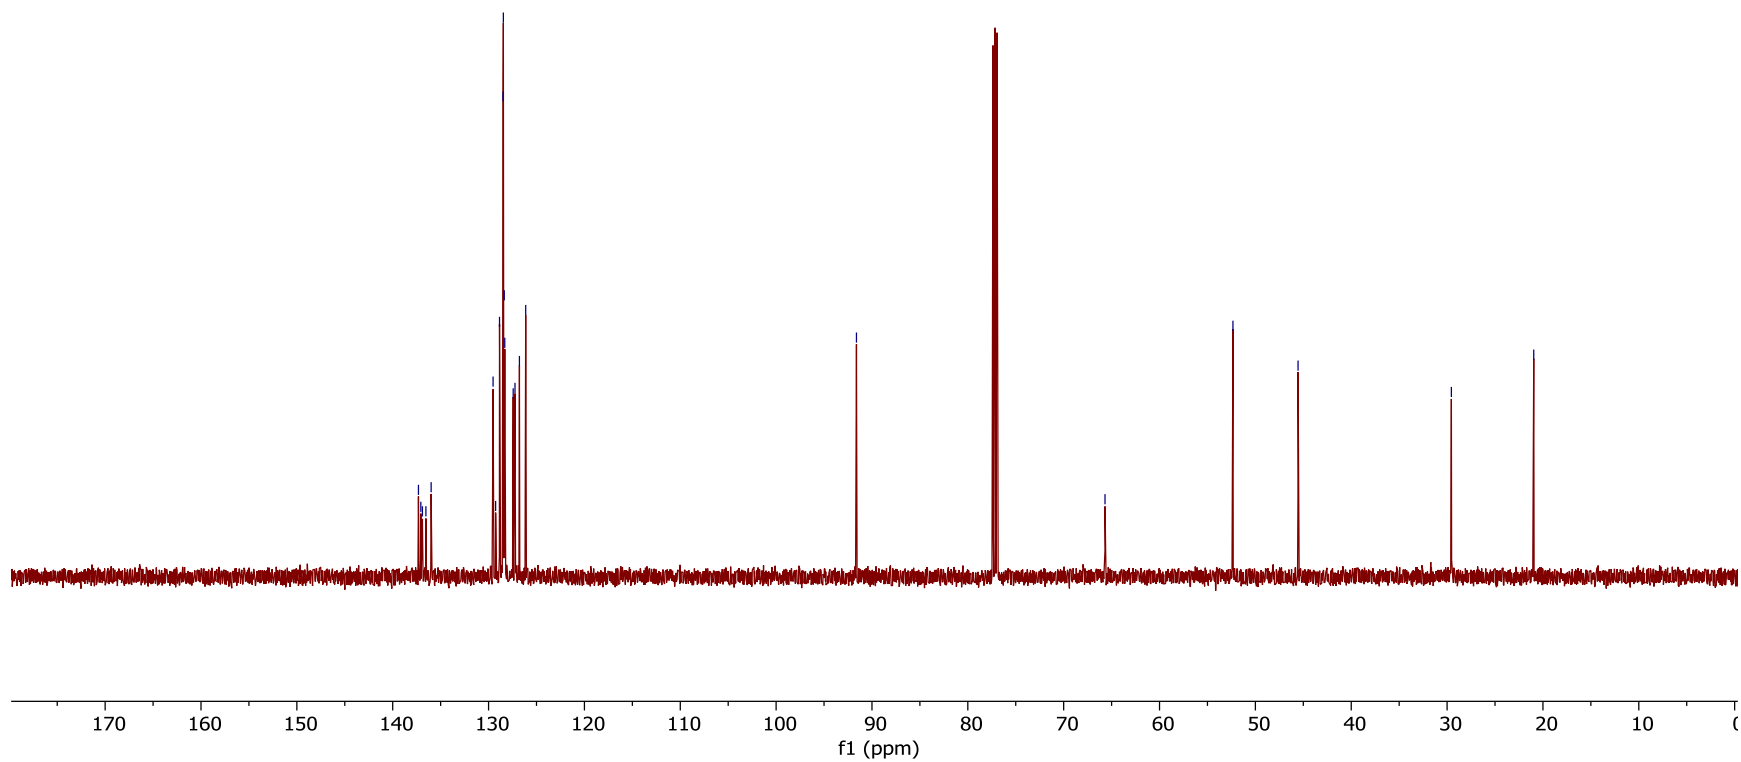

7.58  
7.57  
7.56  
7.56  
7.56  
7.38  
7.38  
7.37  
7.36  
7.36  
7.35  
7.35  
7.34  
7.34  
7.33  
7.33  
7.32  
7.32  
7.21  
7.20  
7.20  
7.19  
7.19  
7.18  
7.18  
7.18  
7.17  
7.16  
7.16  
7.14  
7.14  
7.13  
7.13  
7.13  
7.12  
7.12  
7.11  
7.11  
7.11  
7.05  
7.04  
7.03  
7.02  
7.01  
7.01  
7.01  
7.00  
7.00  
6.99  
6.62  
6.62  
6.62  
6.61  
6.60  
6.59  
6.59  
3.93  
3.91  
3.40  
3.38  
3.38  
3.34  
3.33  
3.32  
3.08  
3.06  
3.05  
3.05  
3.04  
3.04  
3.02  
3.02  
2.99  
2.90  
2.88  
2.88  
2.88  
2.86  
2.86  
2.84  
2.15

<sup>1</sup>H NMR of (±)-21 in CDCl<sub>3</sub>

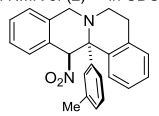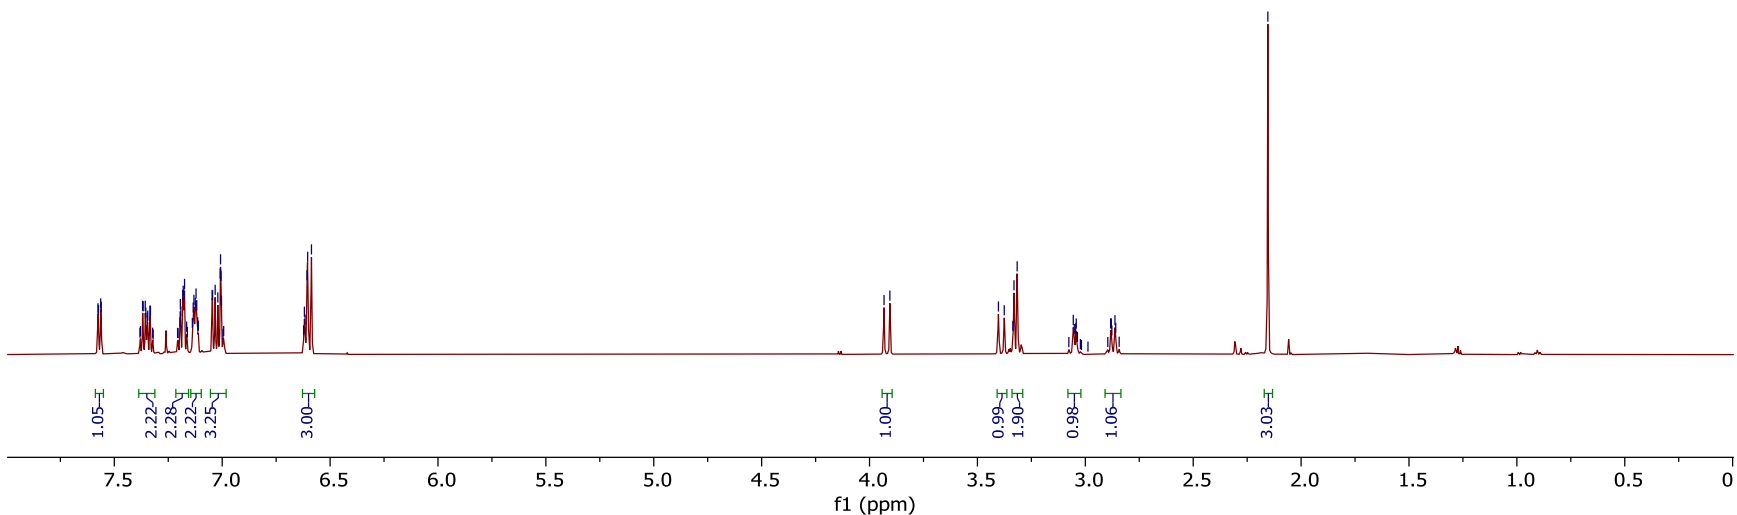

<sup>13</sup>C NMR of (±)-2I in CDCl<sub>3</sub>

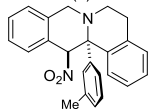

139.68  
137.34  
136.92  
136.86  
135.94  
129.50  
129.42  
129.27  
128.85  
128.38  
128.32  
127.99  
127.40  
127.24  
126.73  
126.11  
125.38

91.59

65.78

52.33

45.60

29.55

21.83

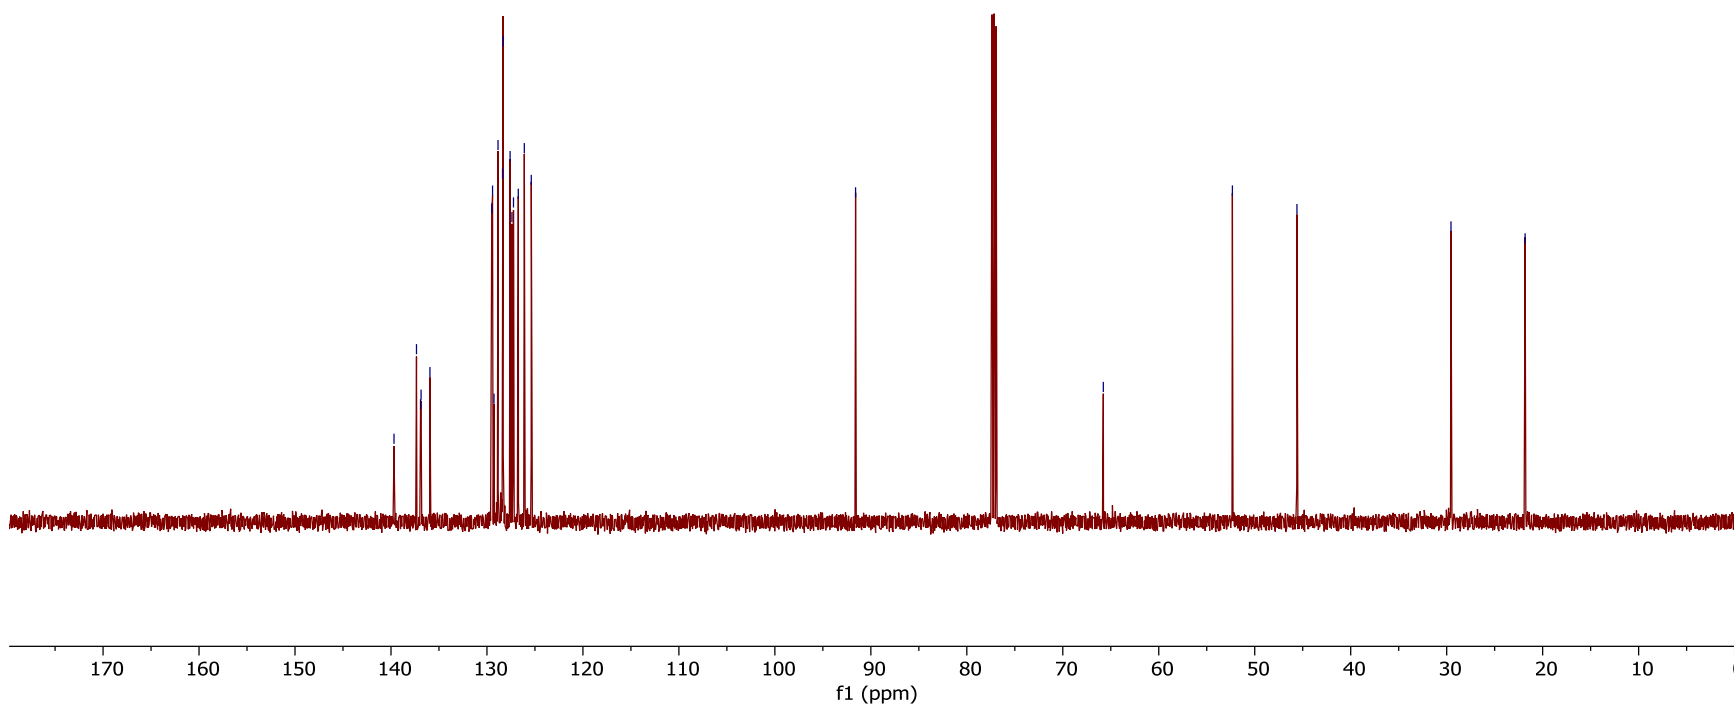

7.83  
7.60  
7.58  
7.48  
7.47  
7.45  
7.44  
7.44  
7.43  
7.42  
7.39  
7.39  
7.38  
7.37  
7.36  
7.36  
7.30  
7.29  
7.29  
7.28  
7.28  
7.22  
7.22  
7.21  
7.21  
7.20  
7.20  
7.20  
7.19  
7.17  
7.17  
7.16  
7.15  
7.15  
6.74  
6.72  
6.51

4.10  
4.07

3.50  
3.47  
3.23  
3.22  
3.21  
3.20  
3.19  
3.16  
3.16  
3.15  
3.14  
3.13  
3.12  
3.11  
3.10  
2.96  
2.96  
2.95  
2.93  
2.93

<sup>1</sup>H NMR of (±)-2m in CDCl<sub>3</sub>

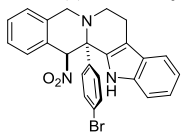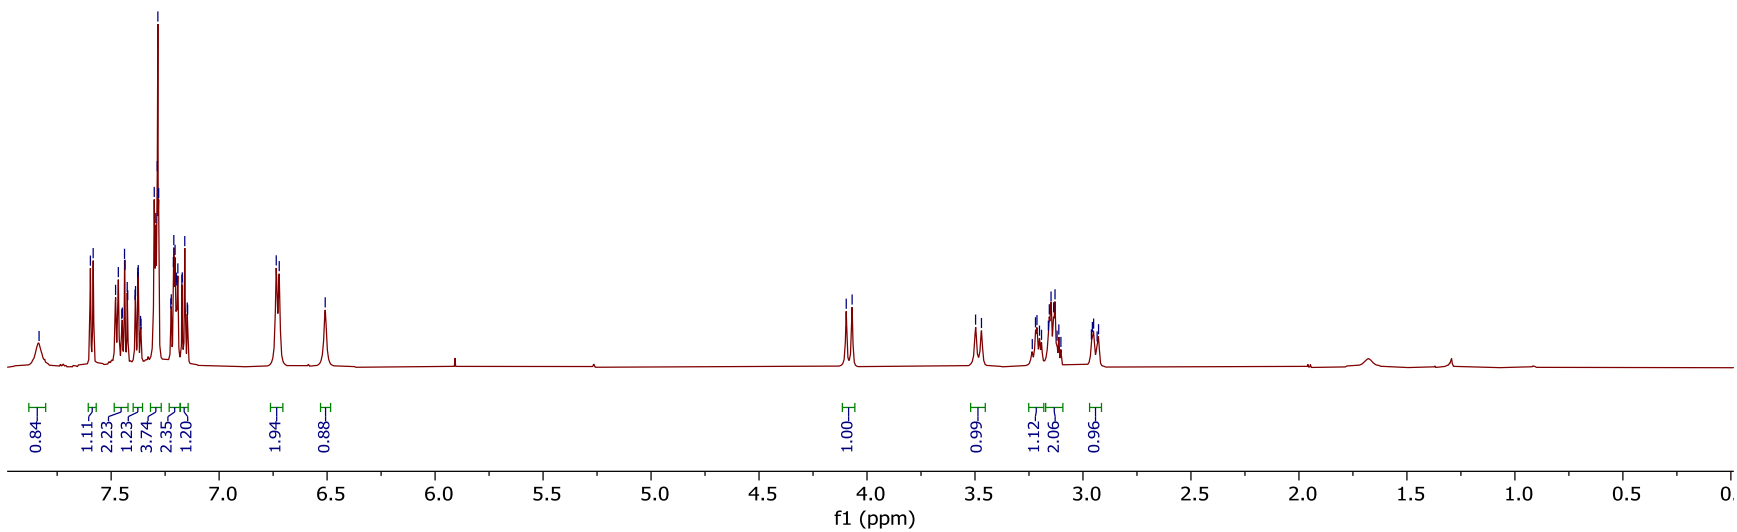

<sup>13</sup>C NMR of (±)-**2m** in CDCl<sub>3</sub>

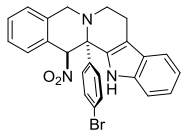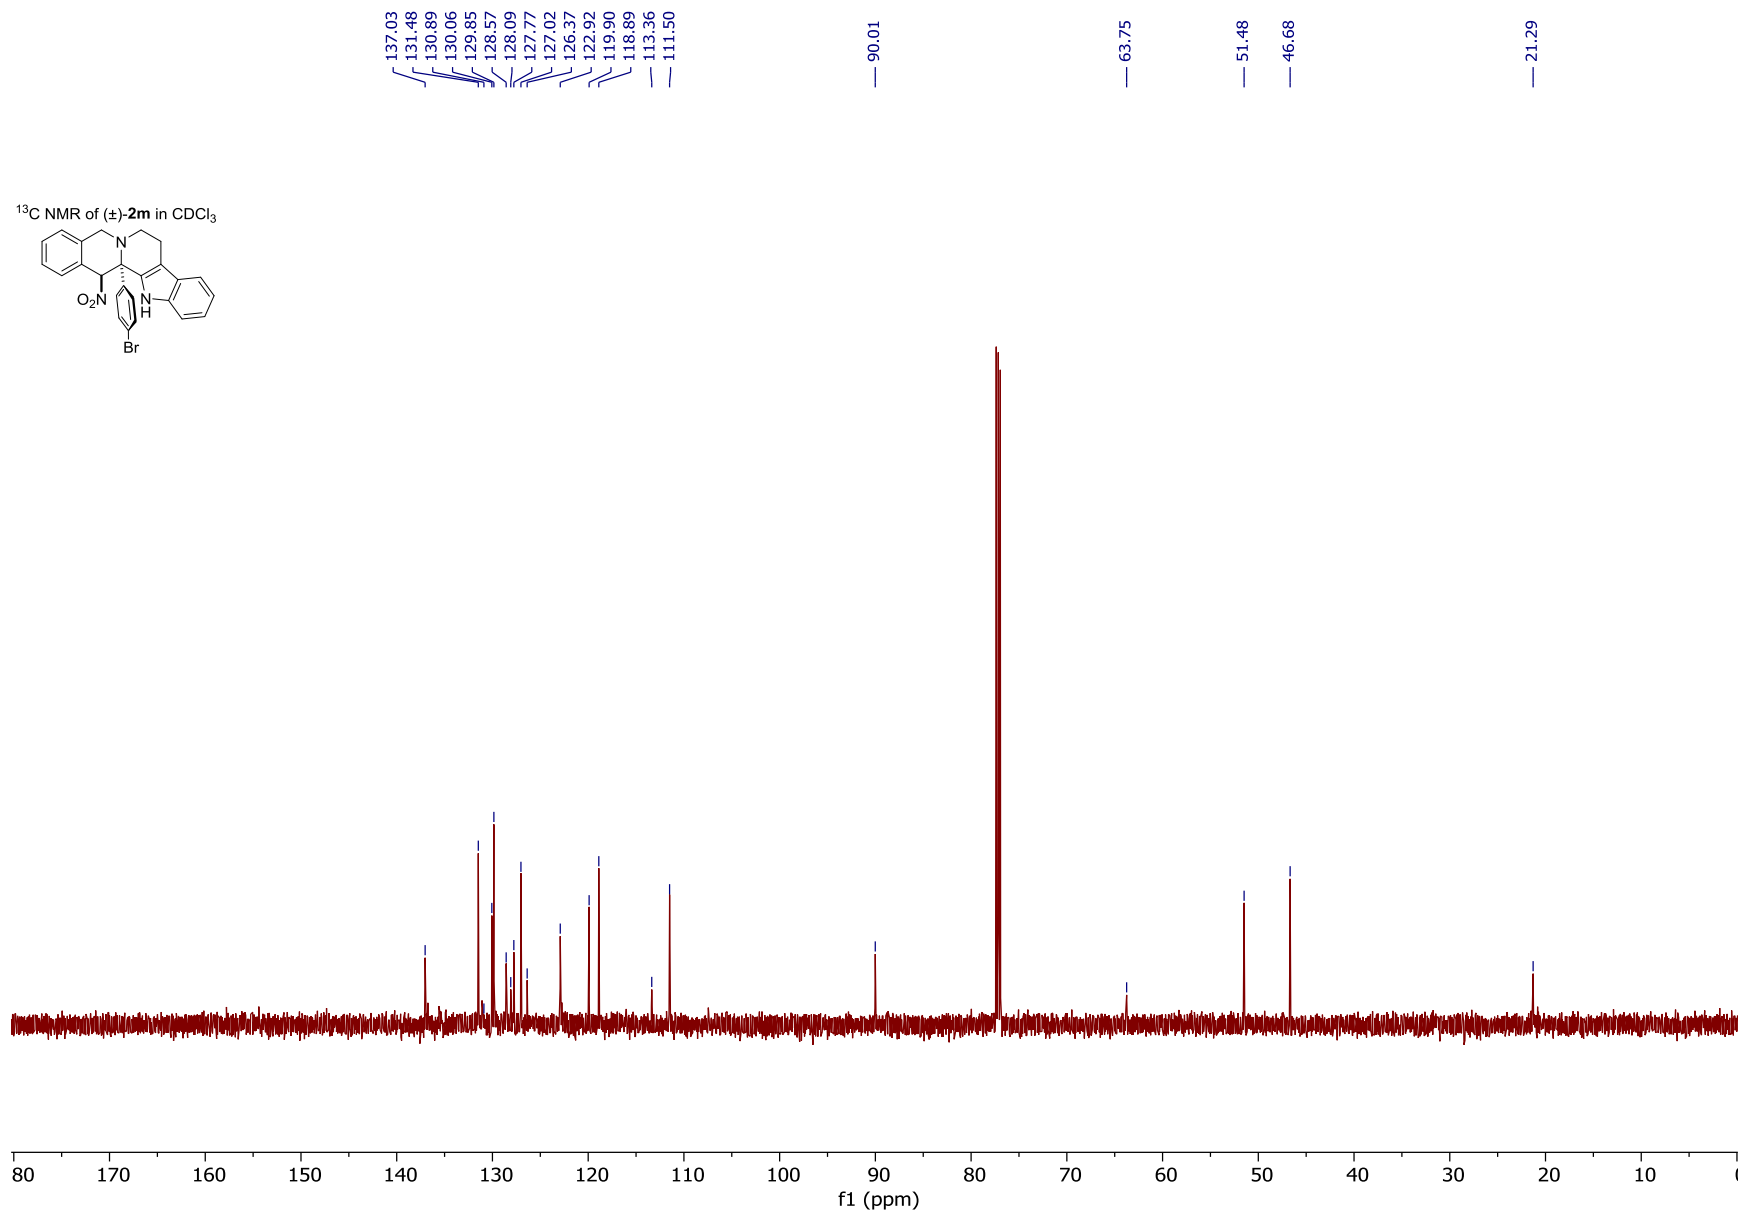

7.32  
7.31  
7.29  
7.26  
7.26  
7.25  
7.24  
7.23  
7.22  
7.21  
7.21  
7.20  
7.19  
7.18  
7.17  
7.17  
7.16  
7.15  
7.14  
7.11  
7.11  
7.10  
7.09

4.08  
4.04  
3.80  
3.79  
3.79  
3.76  
3.76  
3.75  
3.74  
3.72  
3.71

3.43  
3.43  
3.42  
3.42  
3.39  
3.38  
3.24  
3.23  
3.22  
3.21  
3.20  
3.19  
3.19  
3.18  
3.18  
3.00  
2.99  
2.97  
2.96  
2.96  
2.95  
2.93  
2.92  
2.82  
2.82  
2.81  
2.78  
2.77  
2.71  
2.70  
2.68  
2.67  
2.64  
2.64

<sup>1</sup>H NMR of (±)-**3a** in CDCl<sub>3</sub>

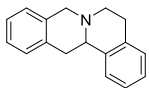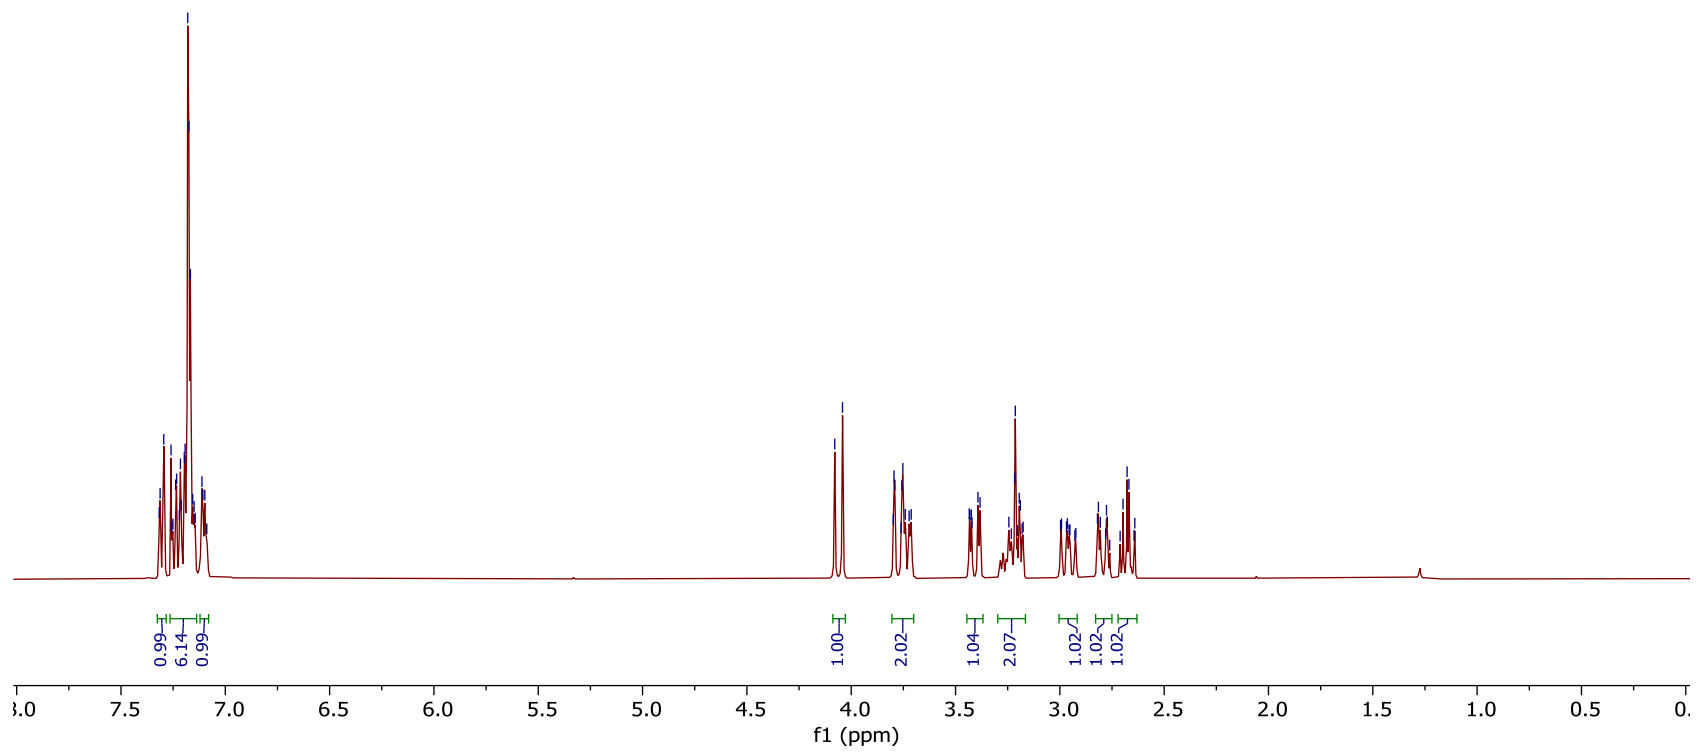

S37

<sup>13</sup>C NMR of (±)-**3a** in CDCl<sub>3</sub>

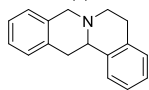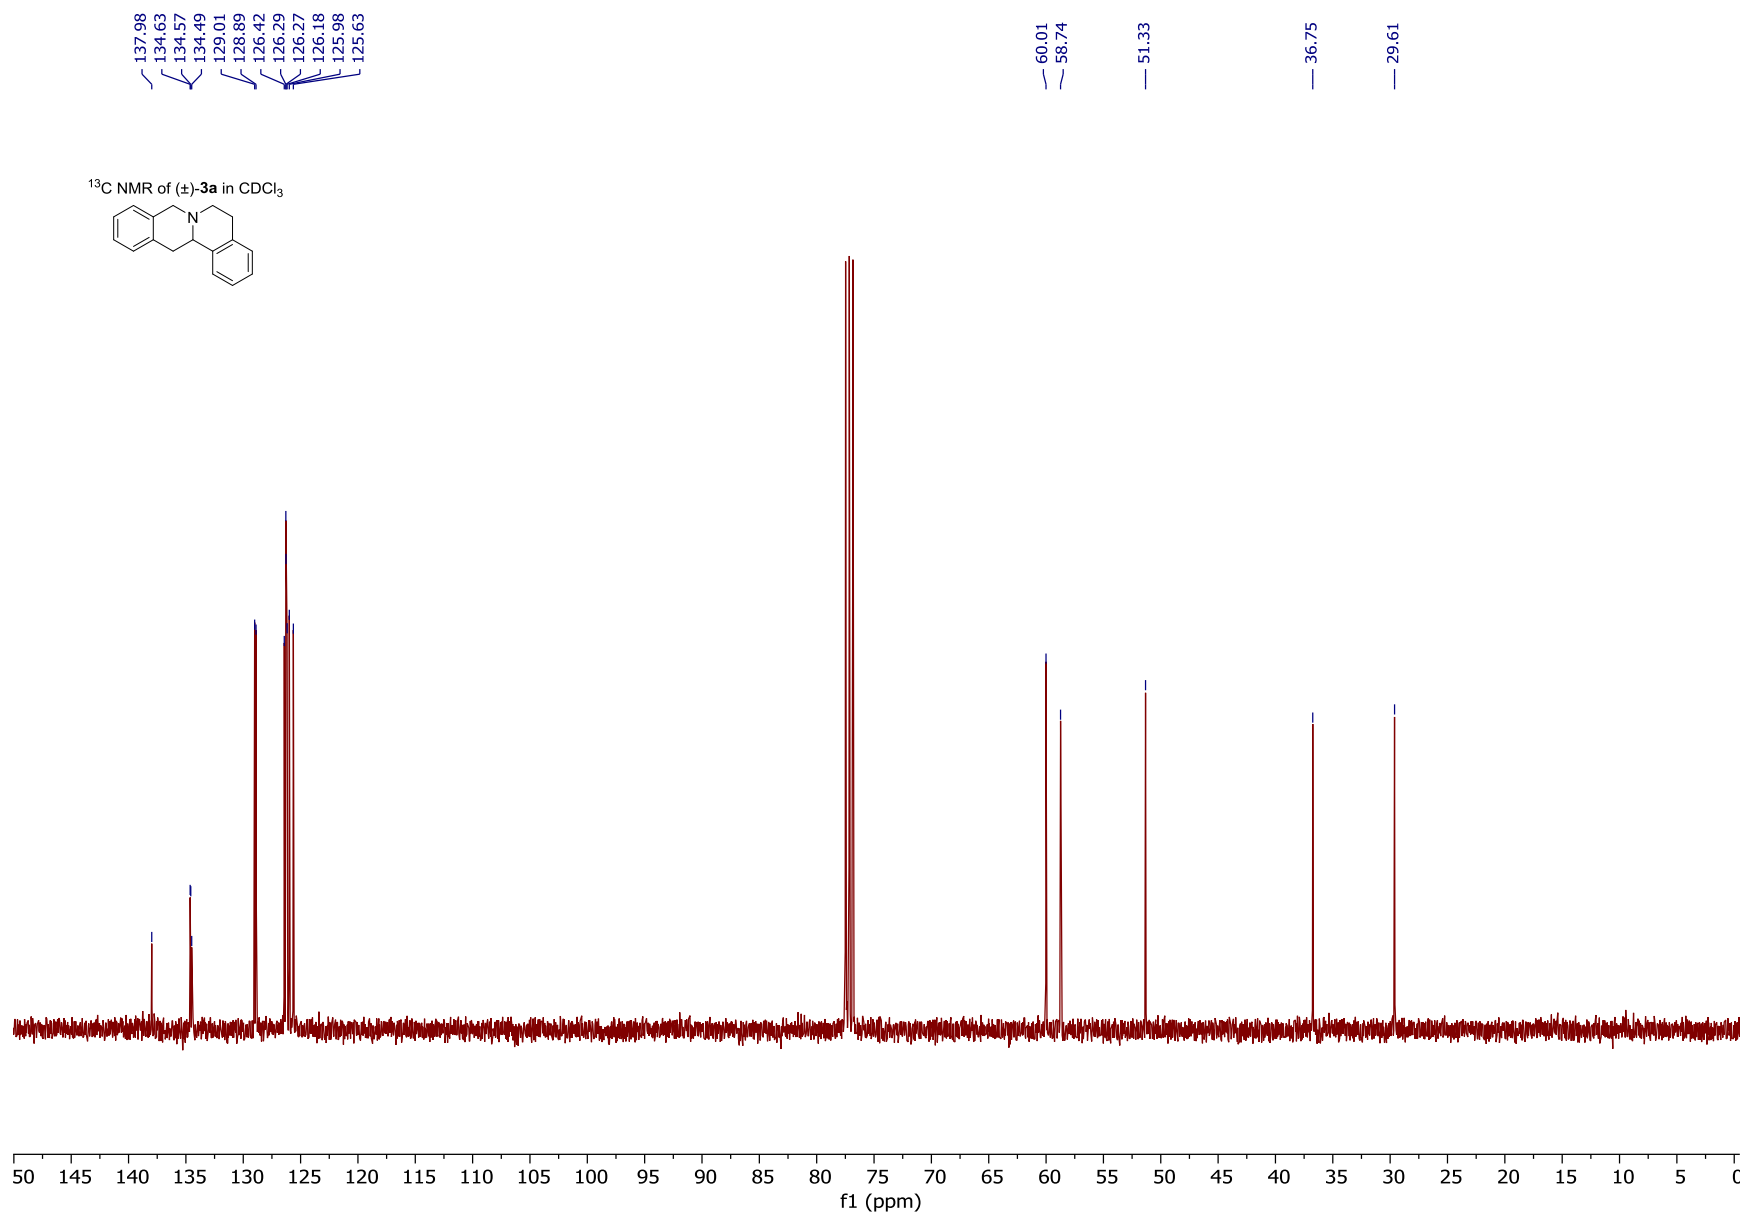

7.21  
7.21  
7.20  
7.20  
7.19  
7.18  
7.17  
7.14  
7.13  
7.12  
7.11  
7.11  
7.10  
7.09

<sup>1</sup>H NMR of (±)-**3b** in CDCl<sub>3</sub>

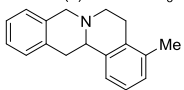

4.10  
4.07  
3.79  
3.76  
3.75  
3.74  
3.44  
3.43  
3.41  
3.40  
3.29  
3.28  
3.28  
3.27  
3.27  
3.26  
3.26  
3.25  
3.05  
3.04  
3.03  
3.02  
3.01  
3.00  
2.99  
2.98  
2.96  
2.95  
2.93  
2.79  
2.78  
2.78  
2.76  
2.76  
2.75  
2.69  
2.68  
2.66  
2.65  
2.64  
2.31

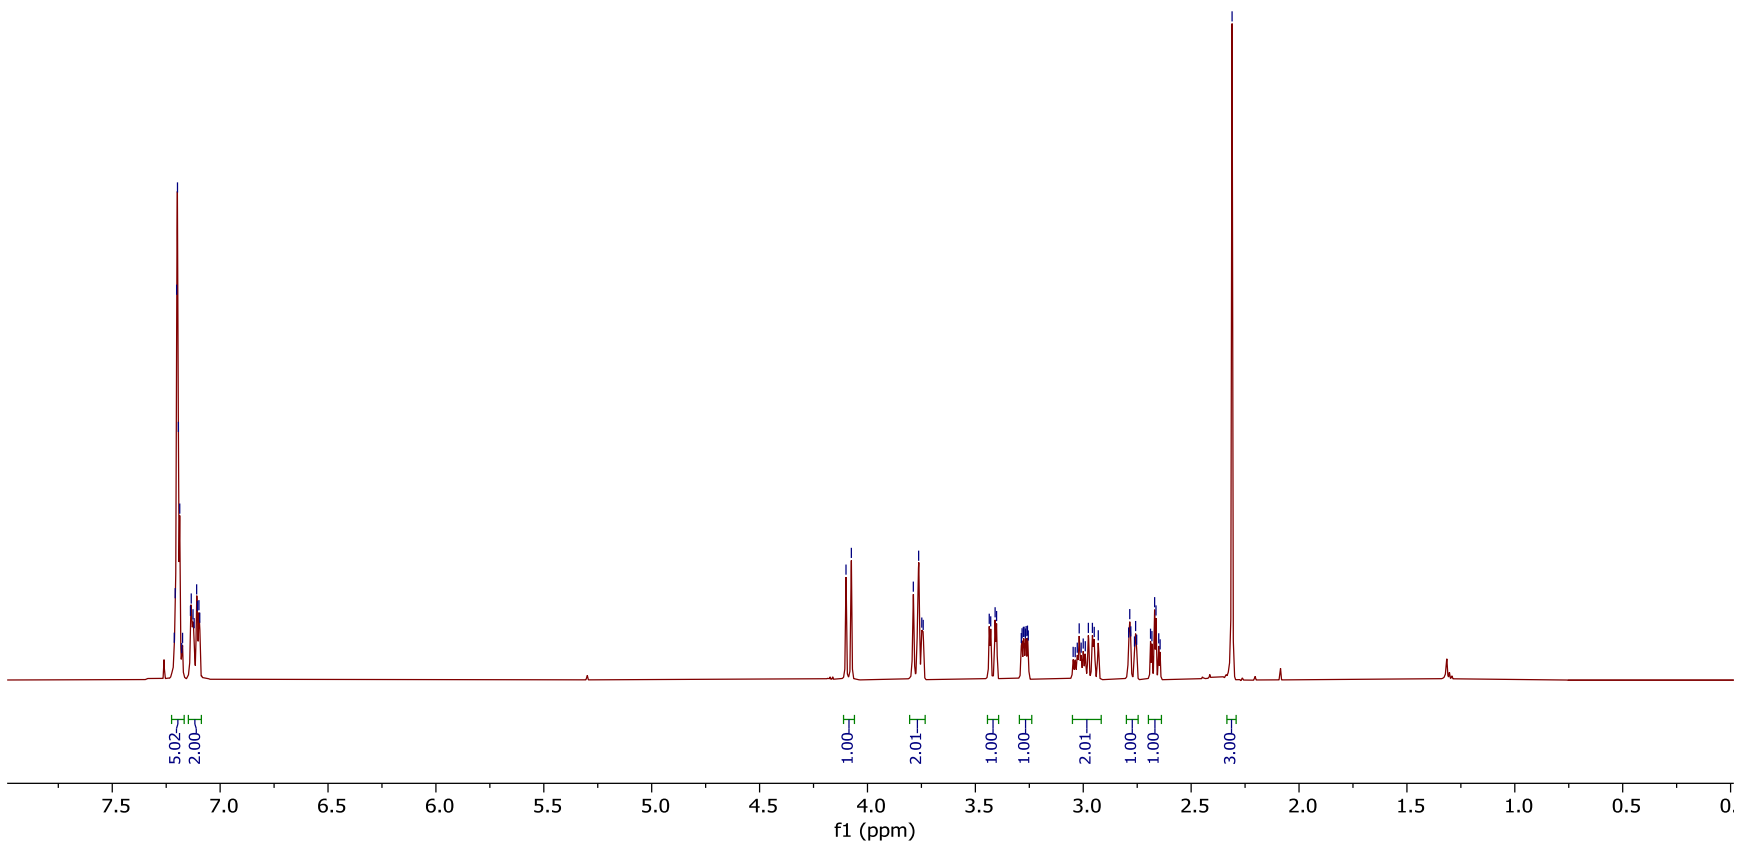



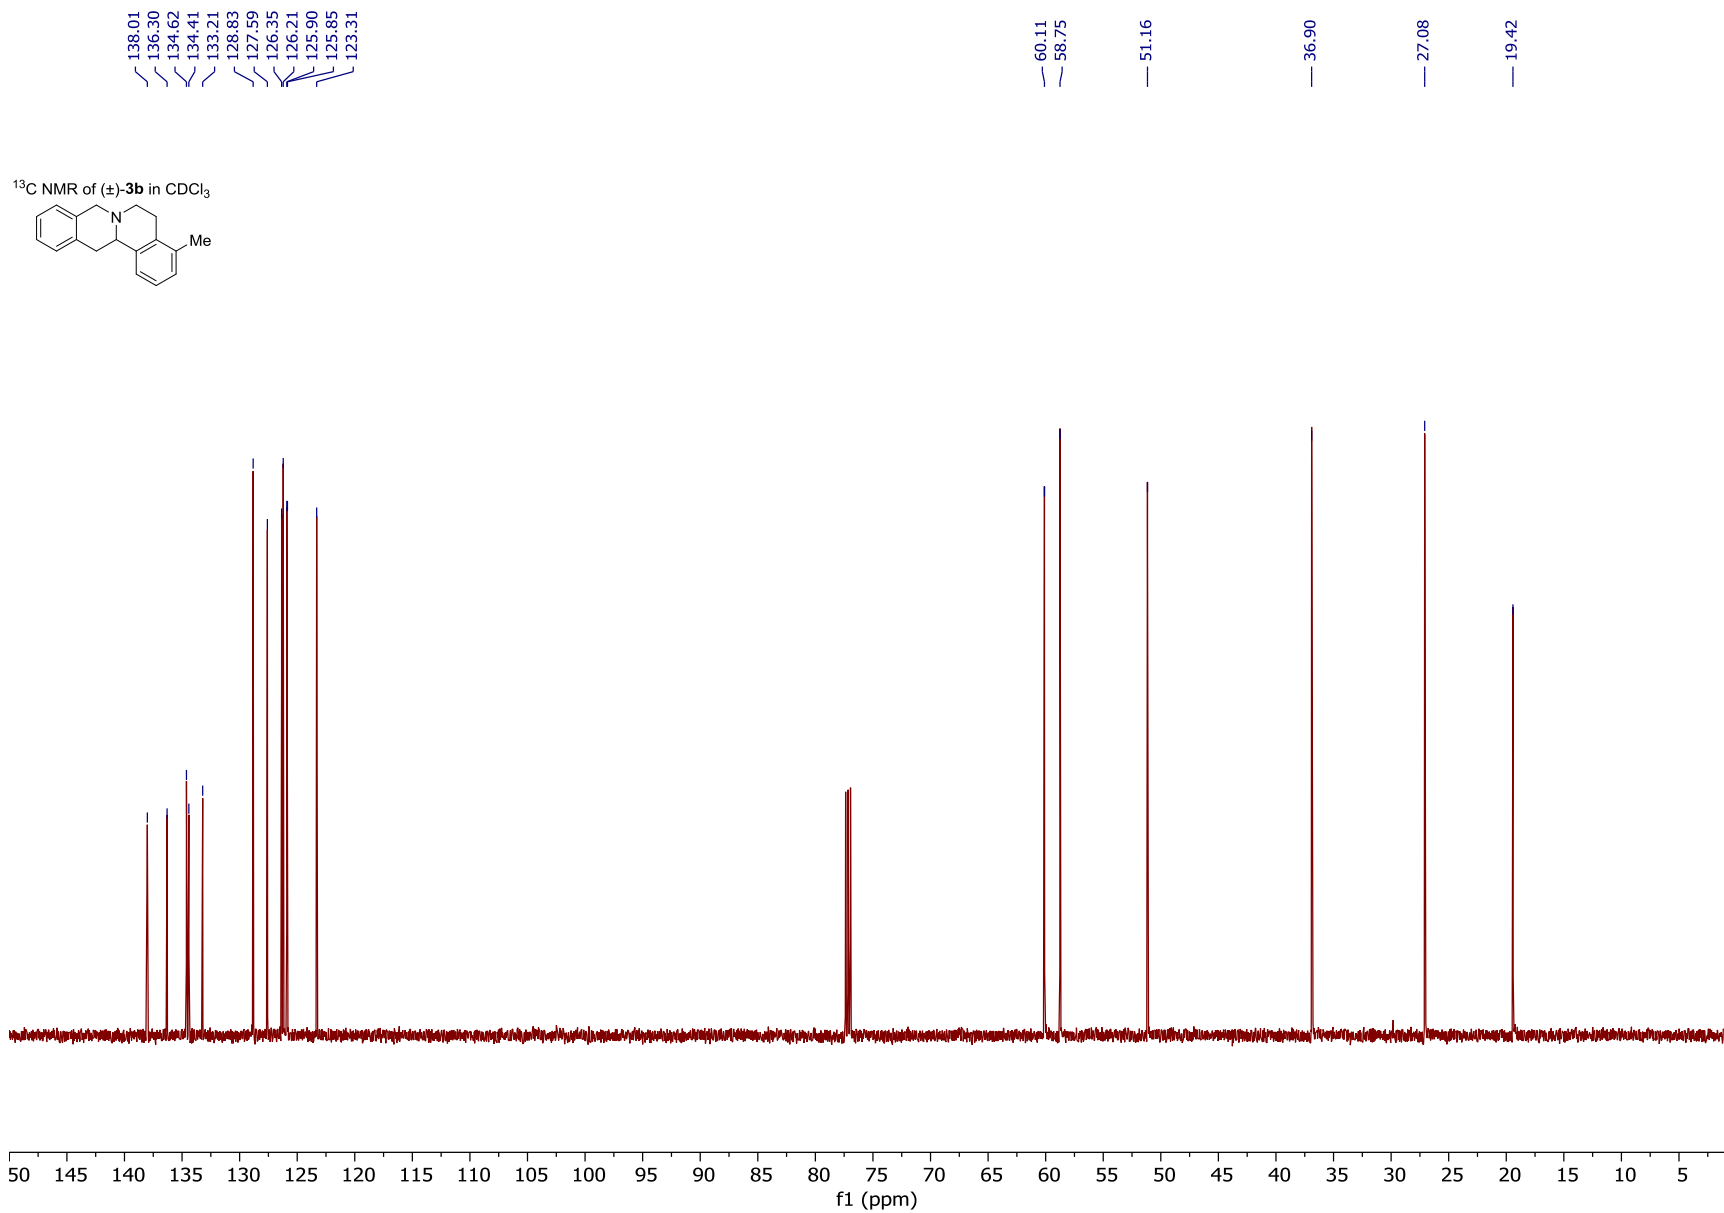

7.18  
7.17  
7.17  
7.17  
7.16  
7.15  
7.14  
7.10  
7.09  
7.08  
6.75  
6.62

4.07  
4.04  
3.90  
3.87  
3.79  
3.77  
3.77  
3.69  
3.68  
3.67  
3.66  
3.36  
3.35  
3.33  
3.33  
3.20  
3.20  
3.19  
3.18  
3.18  
3.17  
3.16  
3.15  
3.02  
2.97  
2.95  
2.94  
2.92  
2.72  
2.72  
2.70  
2.69  
2.69  
2.67  
2.66  
2.65  
2.64

<sup>1</sup>H NMR of (±)-3c in CDCl<sub>3</sub>

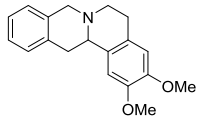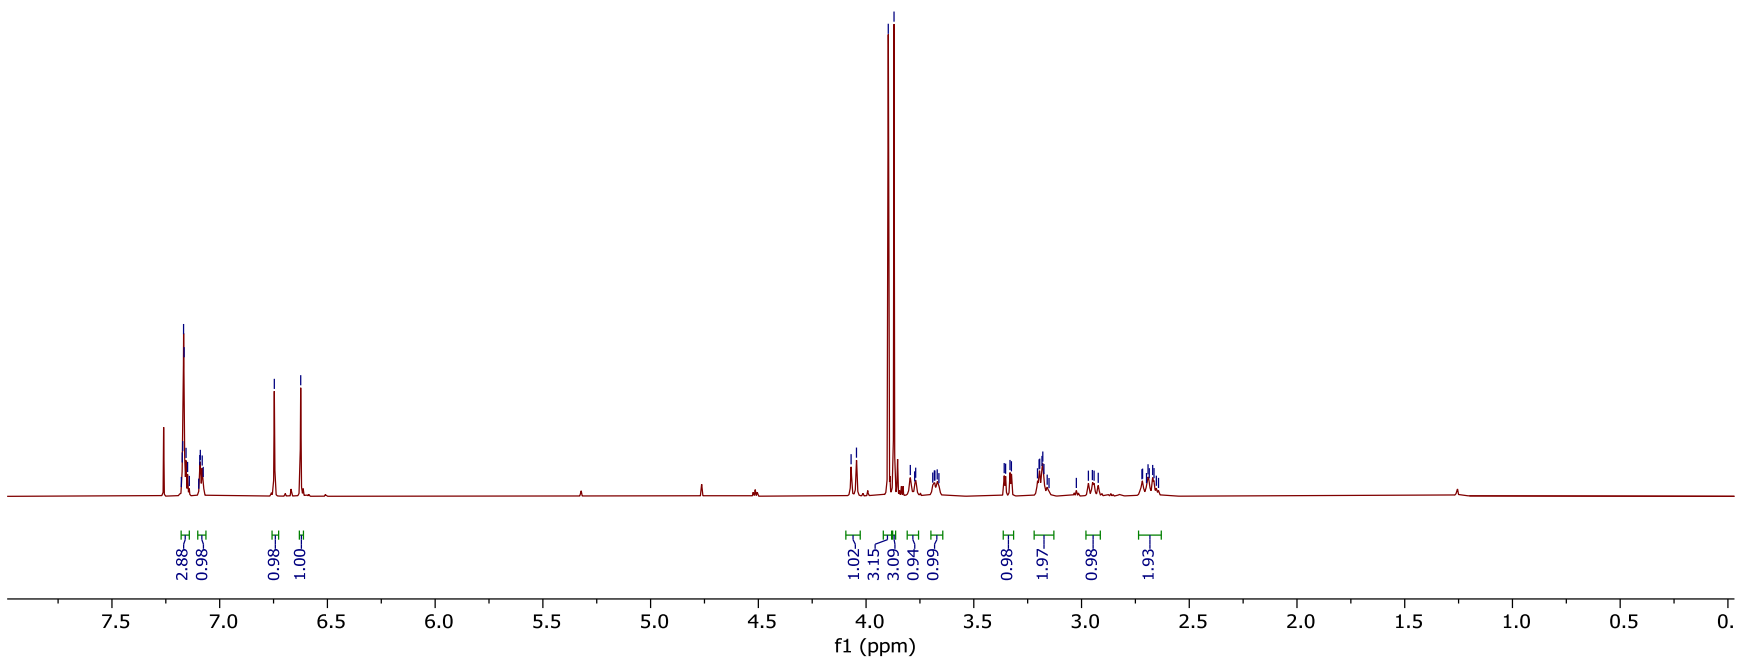

147.62  
147.56  
134.37  
129.66  
128.77  
126.73  
126.39  
126.22  
125.96

111.44  
108.63

59.61  
58.60  
56.17  
55.92  
51.43

36.79

29.04

<sup>13</sup>C NMR of (±)-**3c** in CDCl<sub>3</sub>

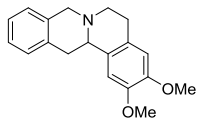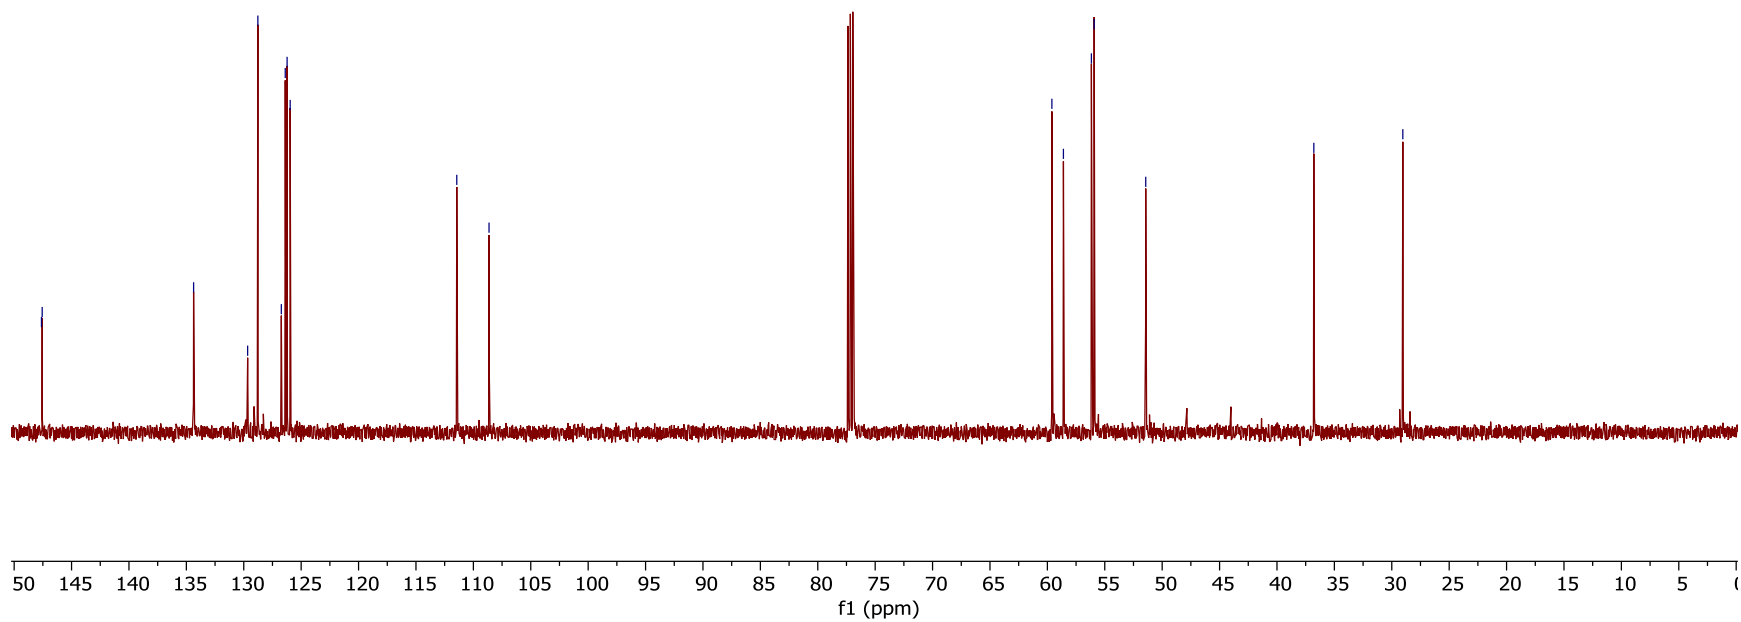

<sup>1</sup>H NMR of (±)-3d in CDCl<sub>3</sub>

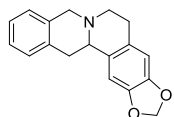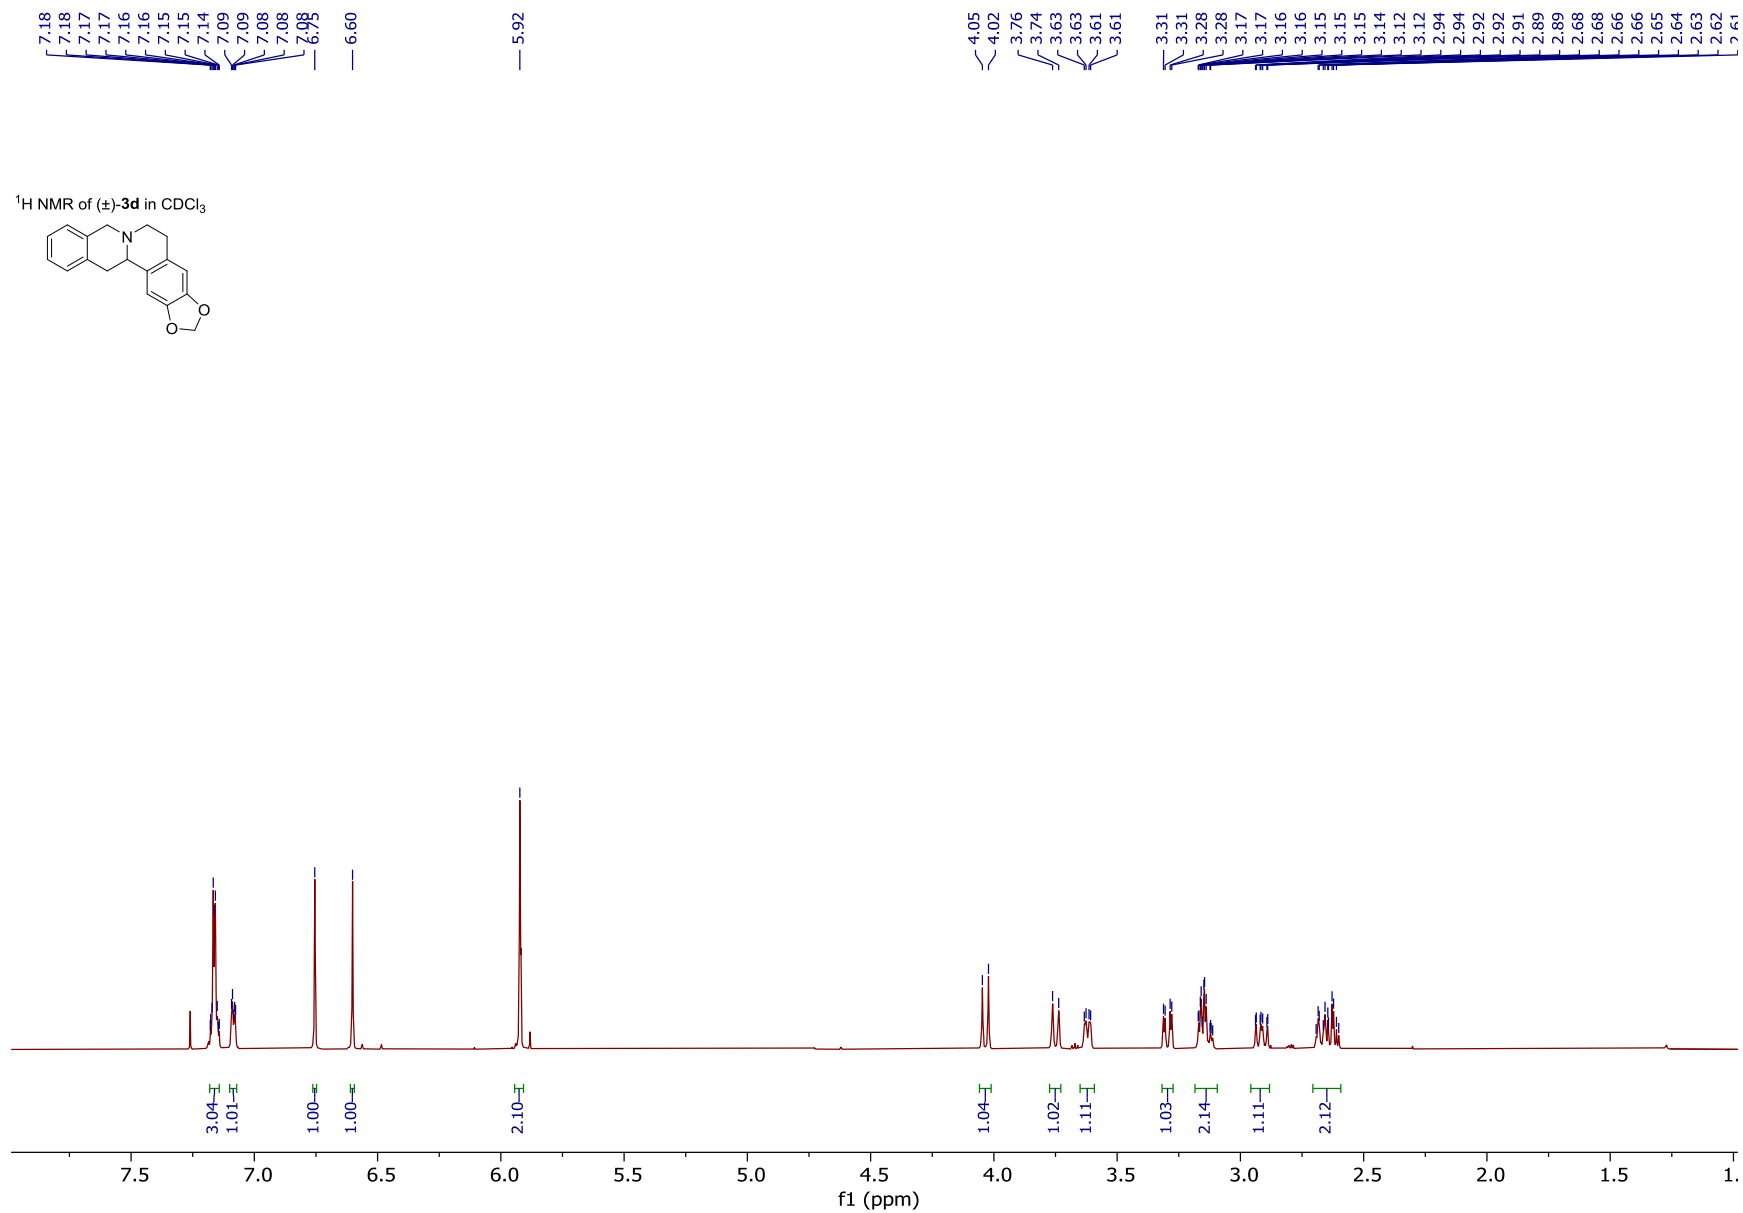

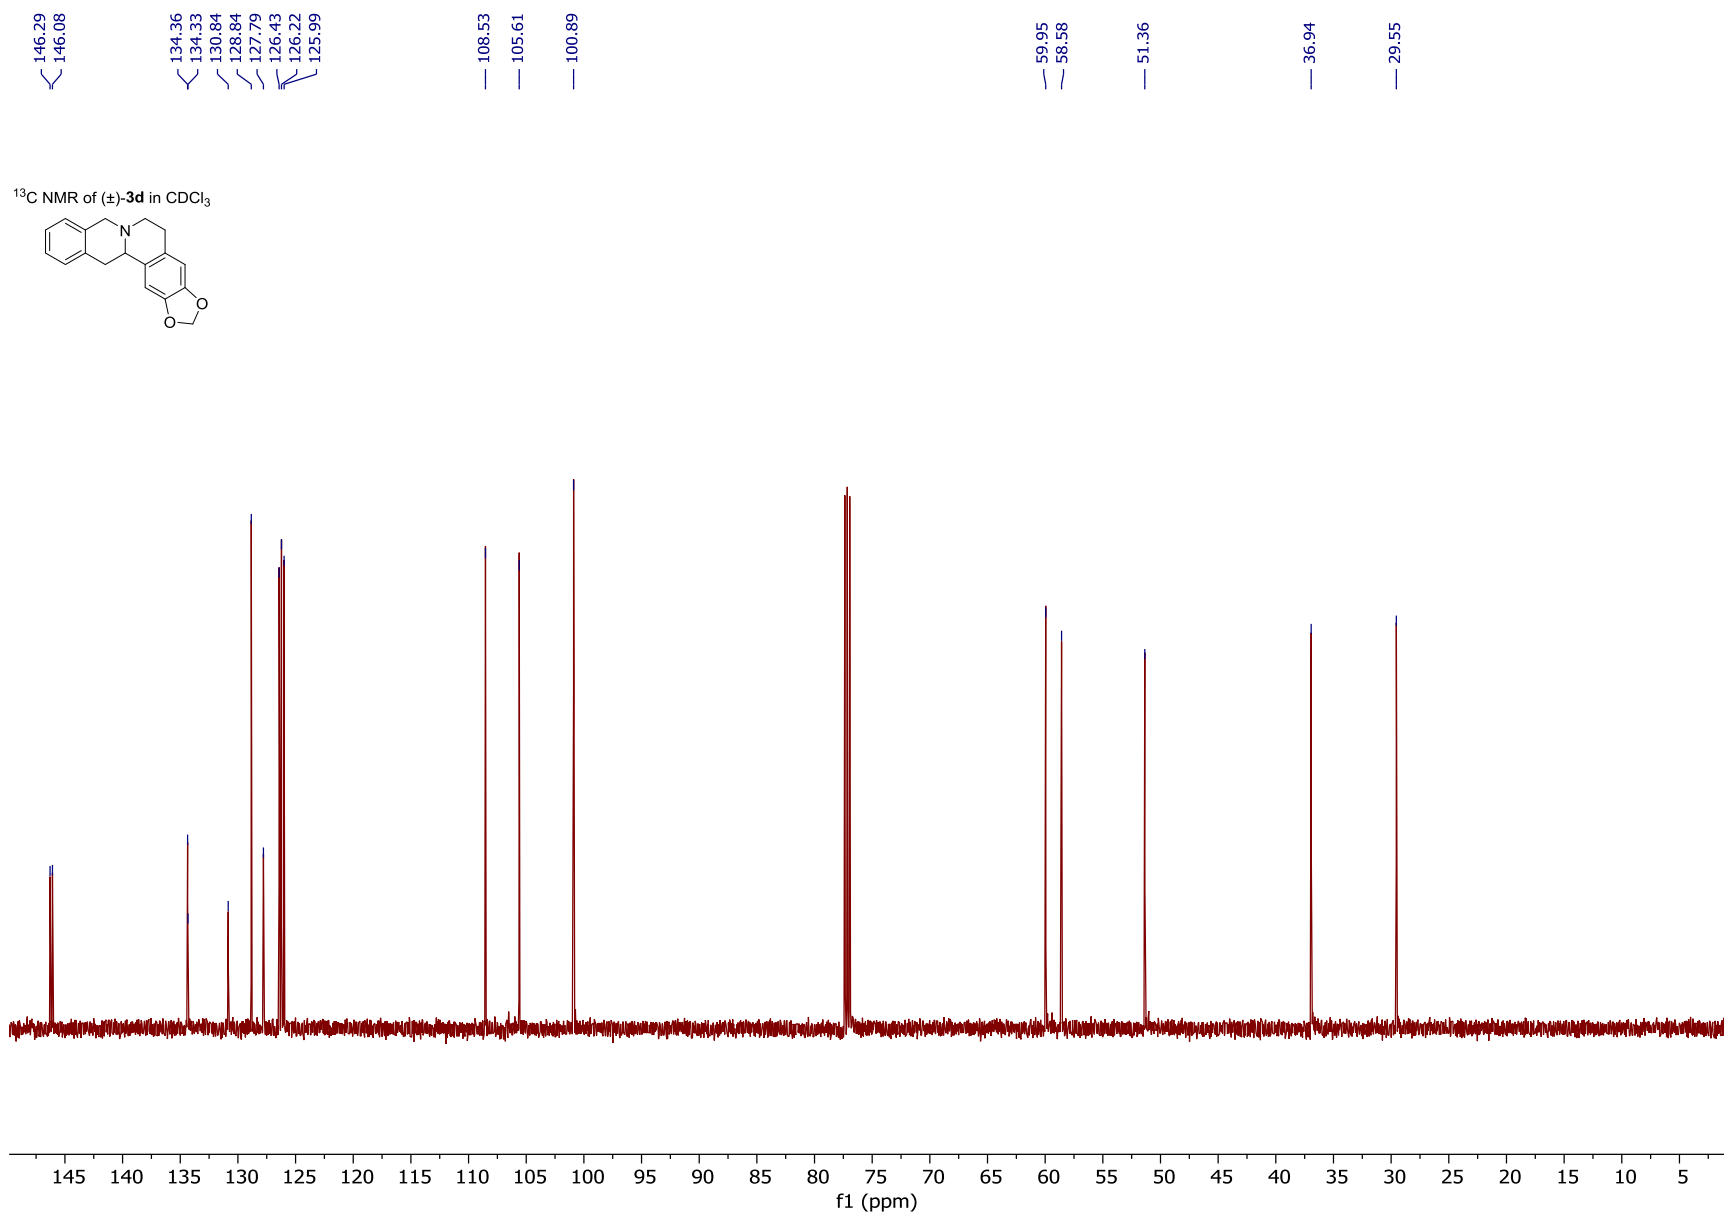

7.25  
7.24  
7.23  
7.22  
7.21  
7.20  
7.19  
7.18  
7.17  
7.16  
7.15  
7.14  
7.13  
7.07  
7.06  
7.05  
7.04  
6.98  
6.97  
6.78  
6.76

3.71  
3.68  
3.66  
3.63  
3.60  
3.57  
3.46  
3.43  
3.28  
3.20  
3.19  
3.18  
3.17  
3.17  
3.16  
3.11  
3.04  
3.04  
3.03  
3.02  
3.01  
3.00

<sup>1</sup>H NMR of (±)-**3e** in CDCl<sub>3</sub>

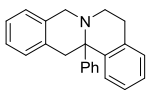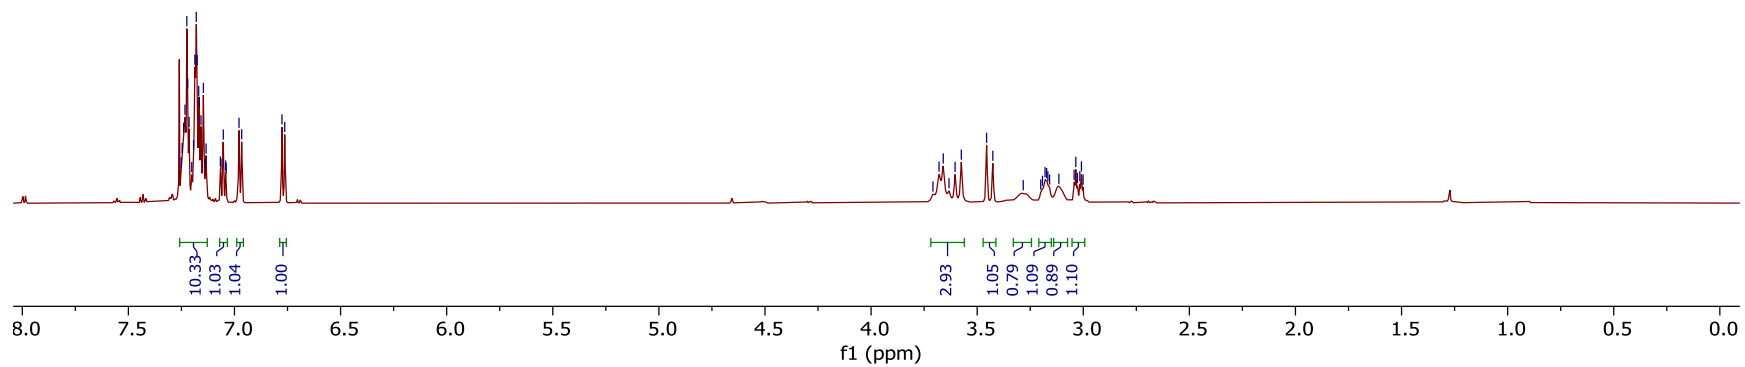

<sup>13</sup>C NMR of (±)-**3e** in CDCl<sub>3</sub>

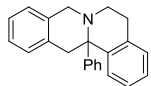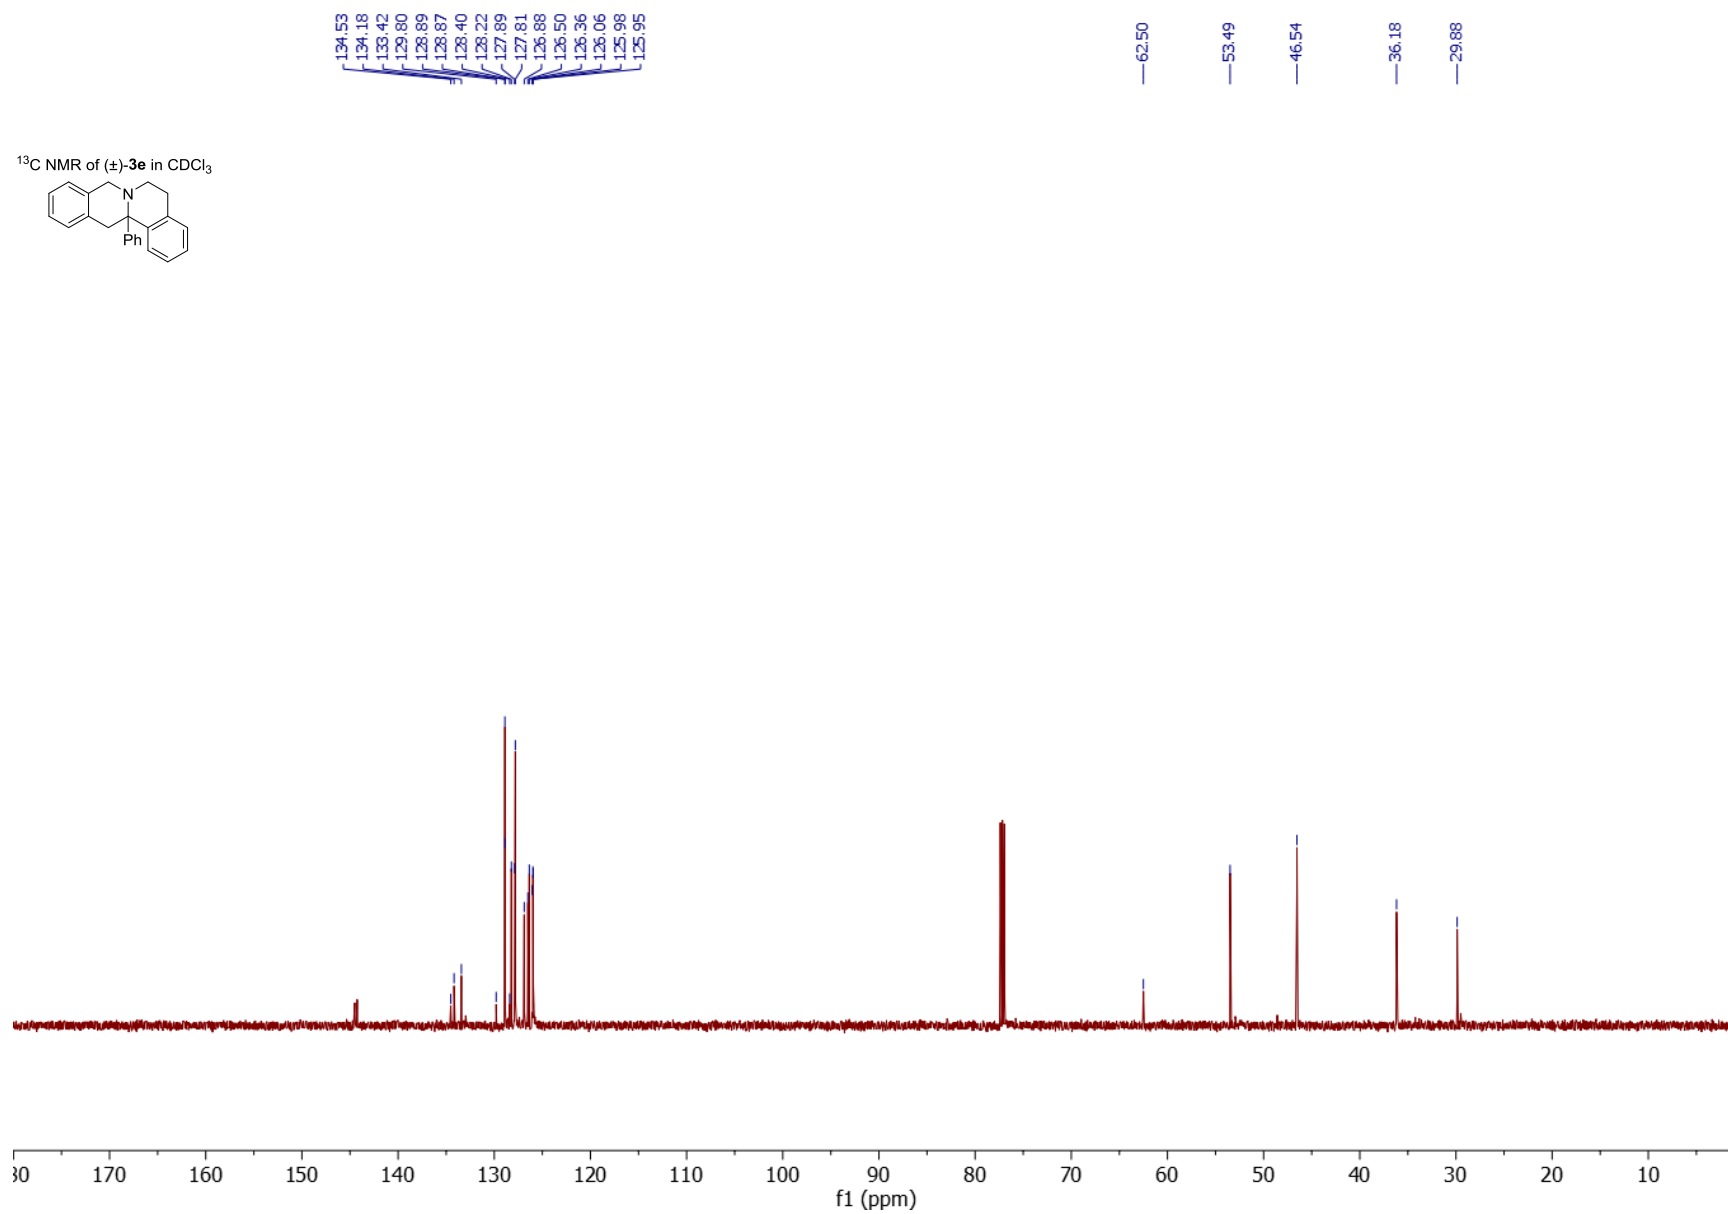

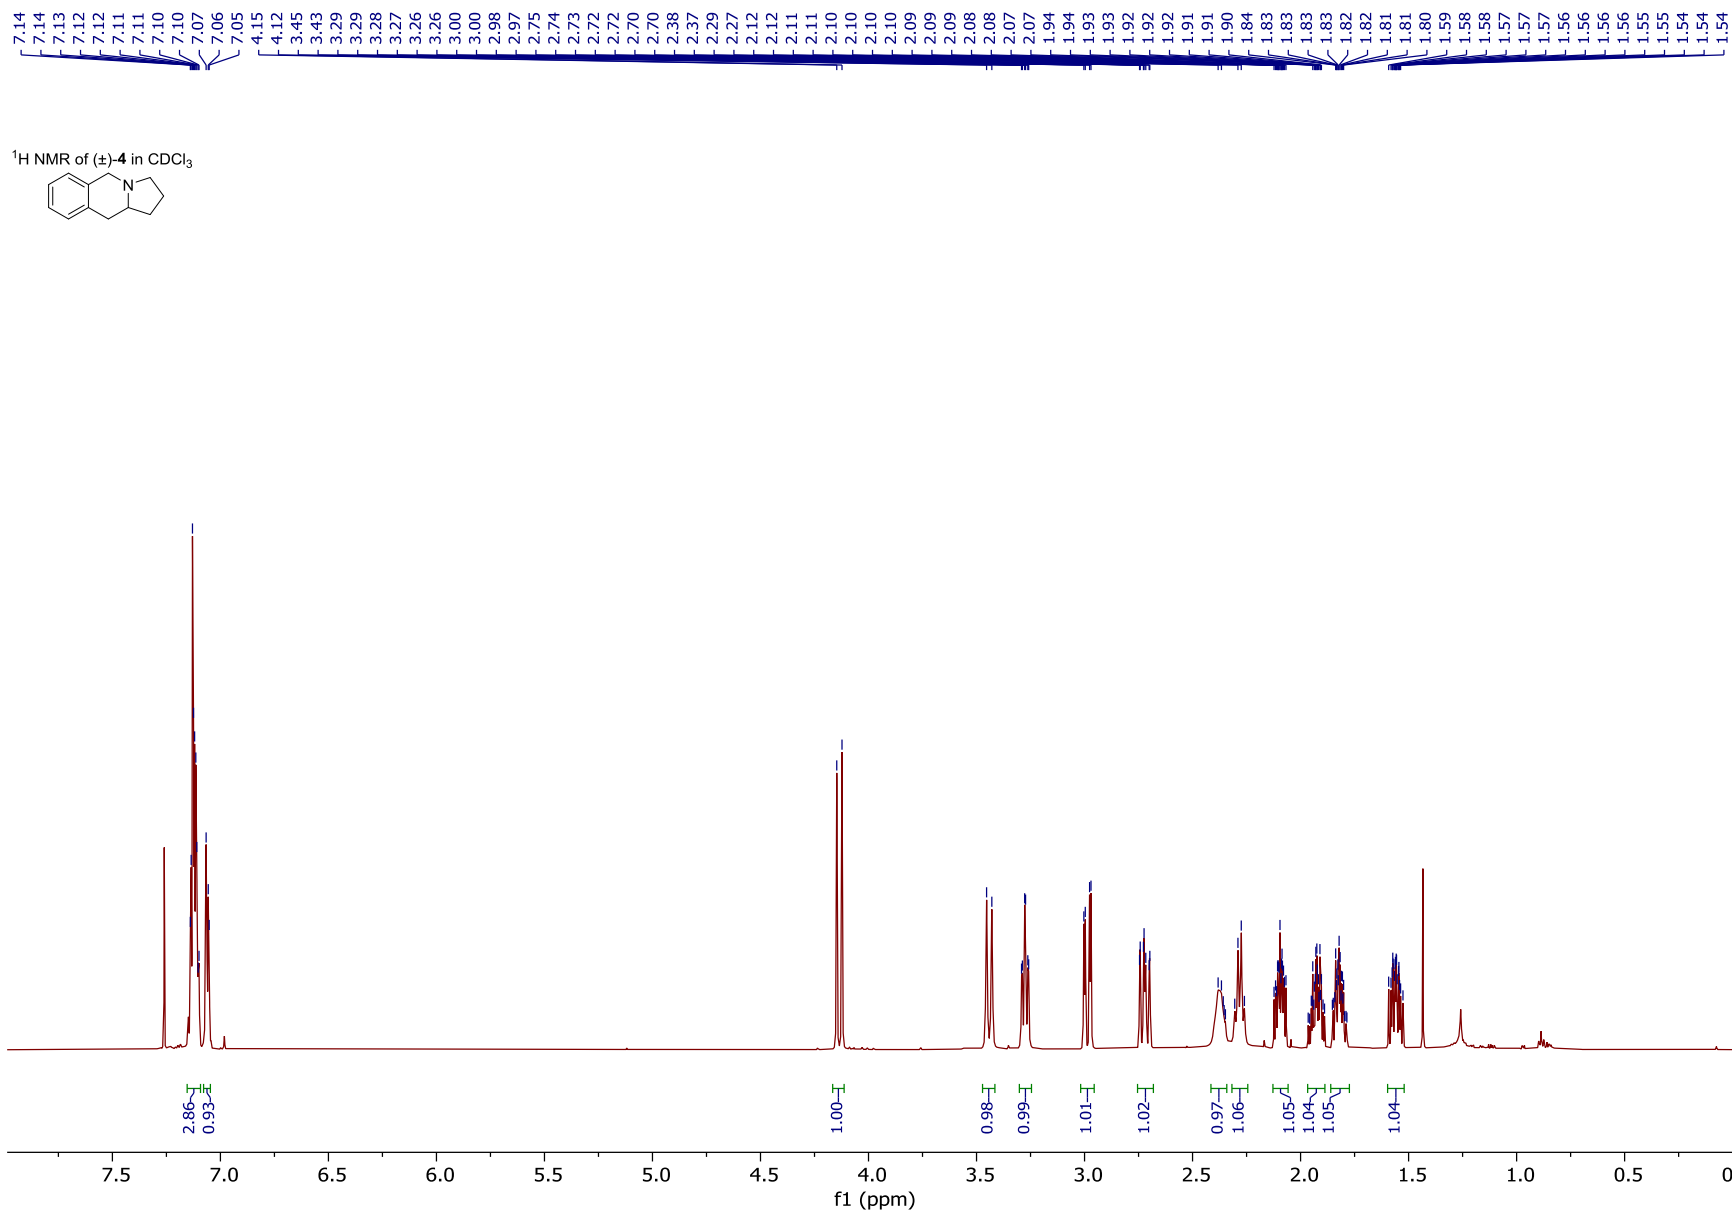



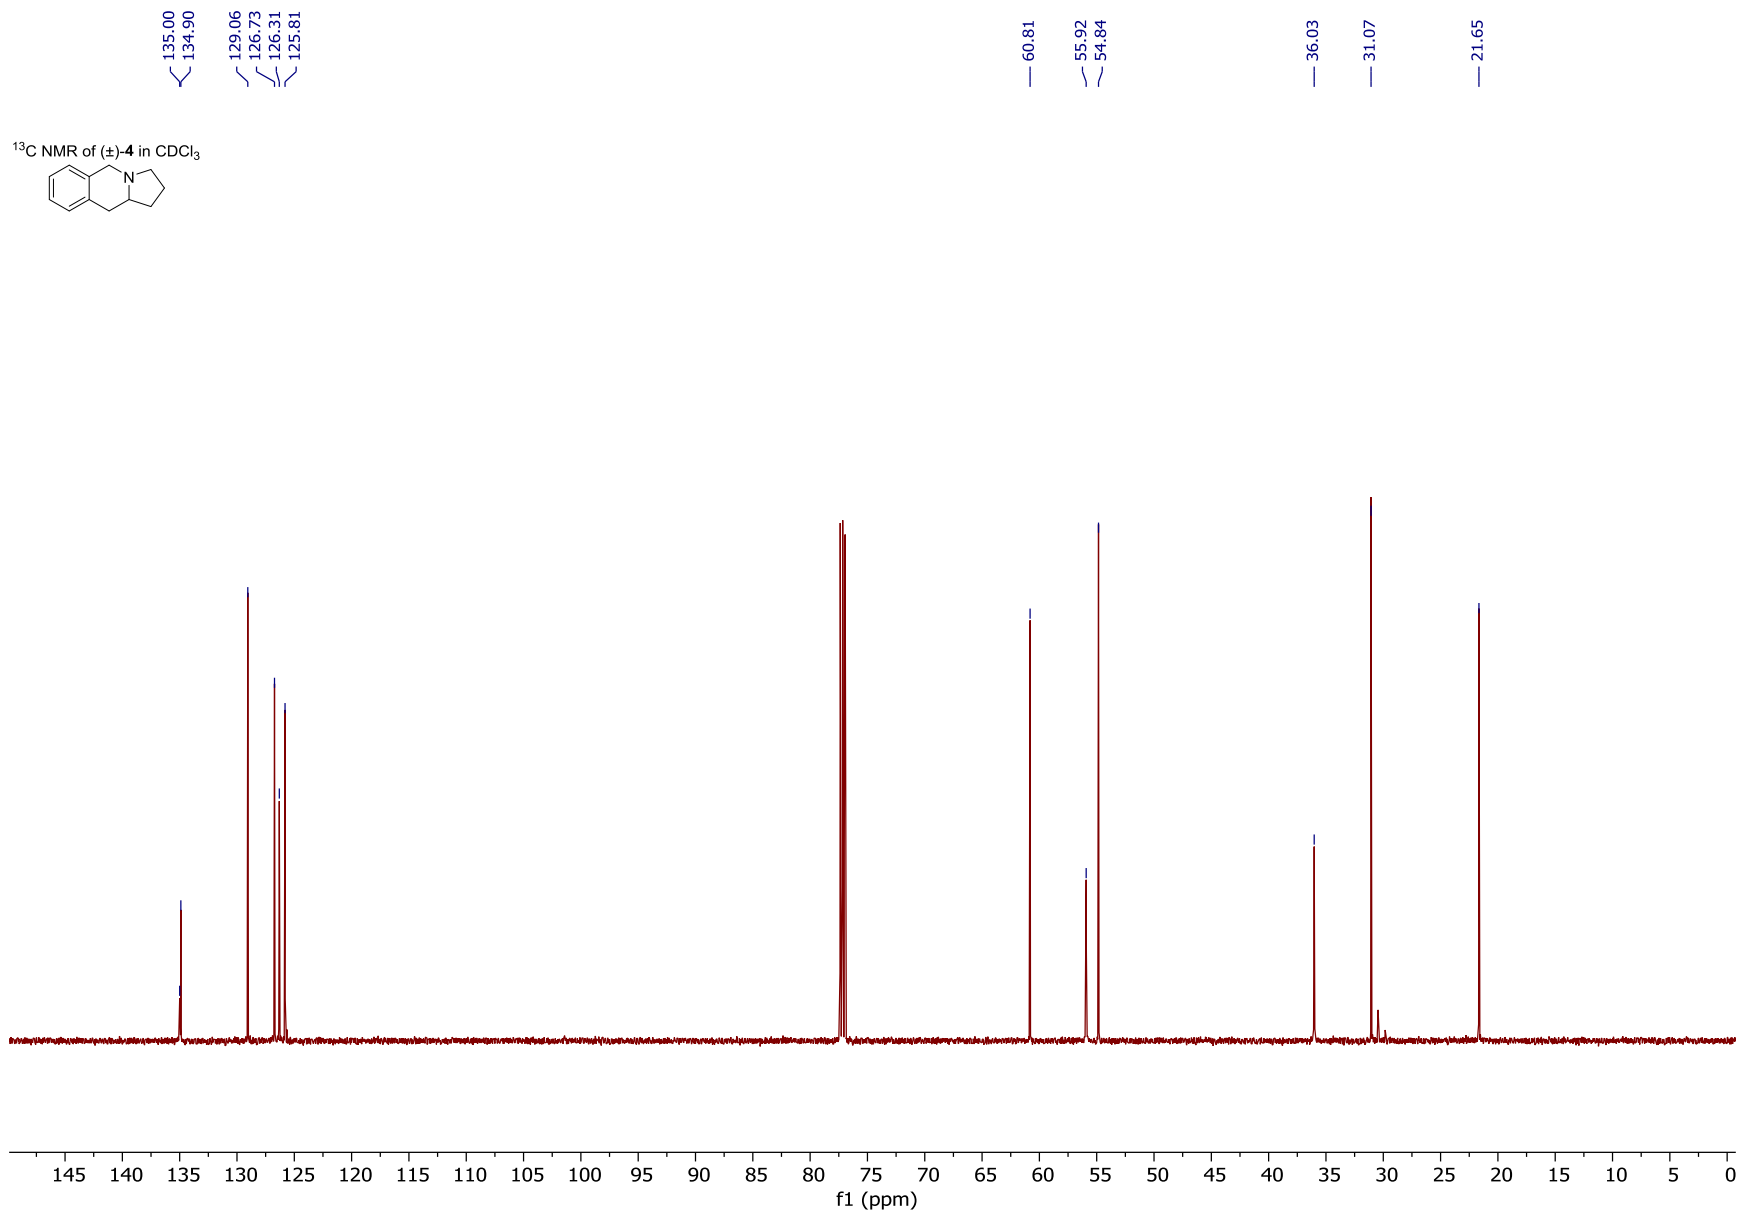

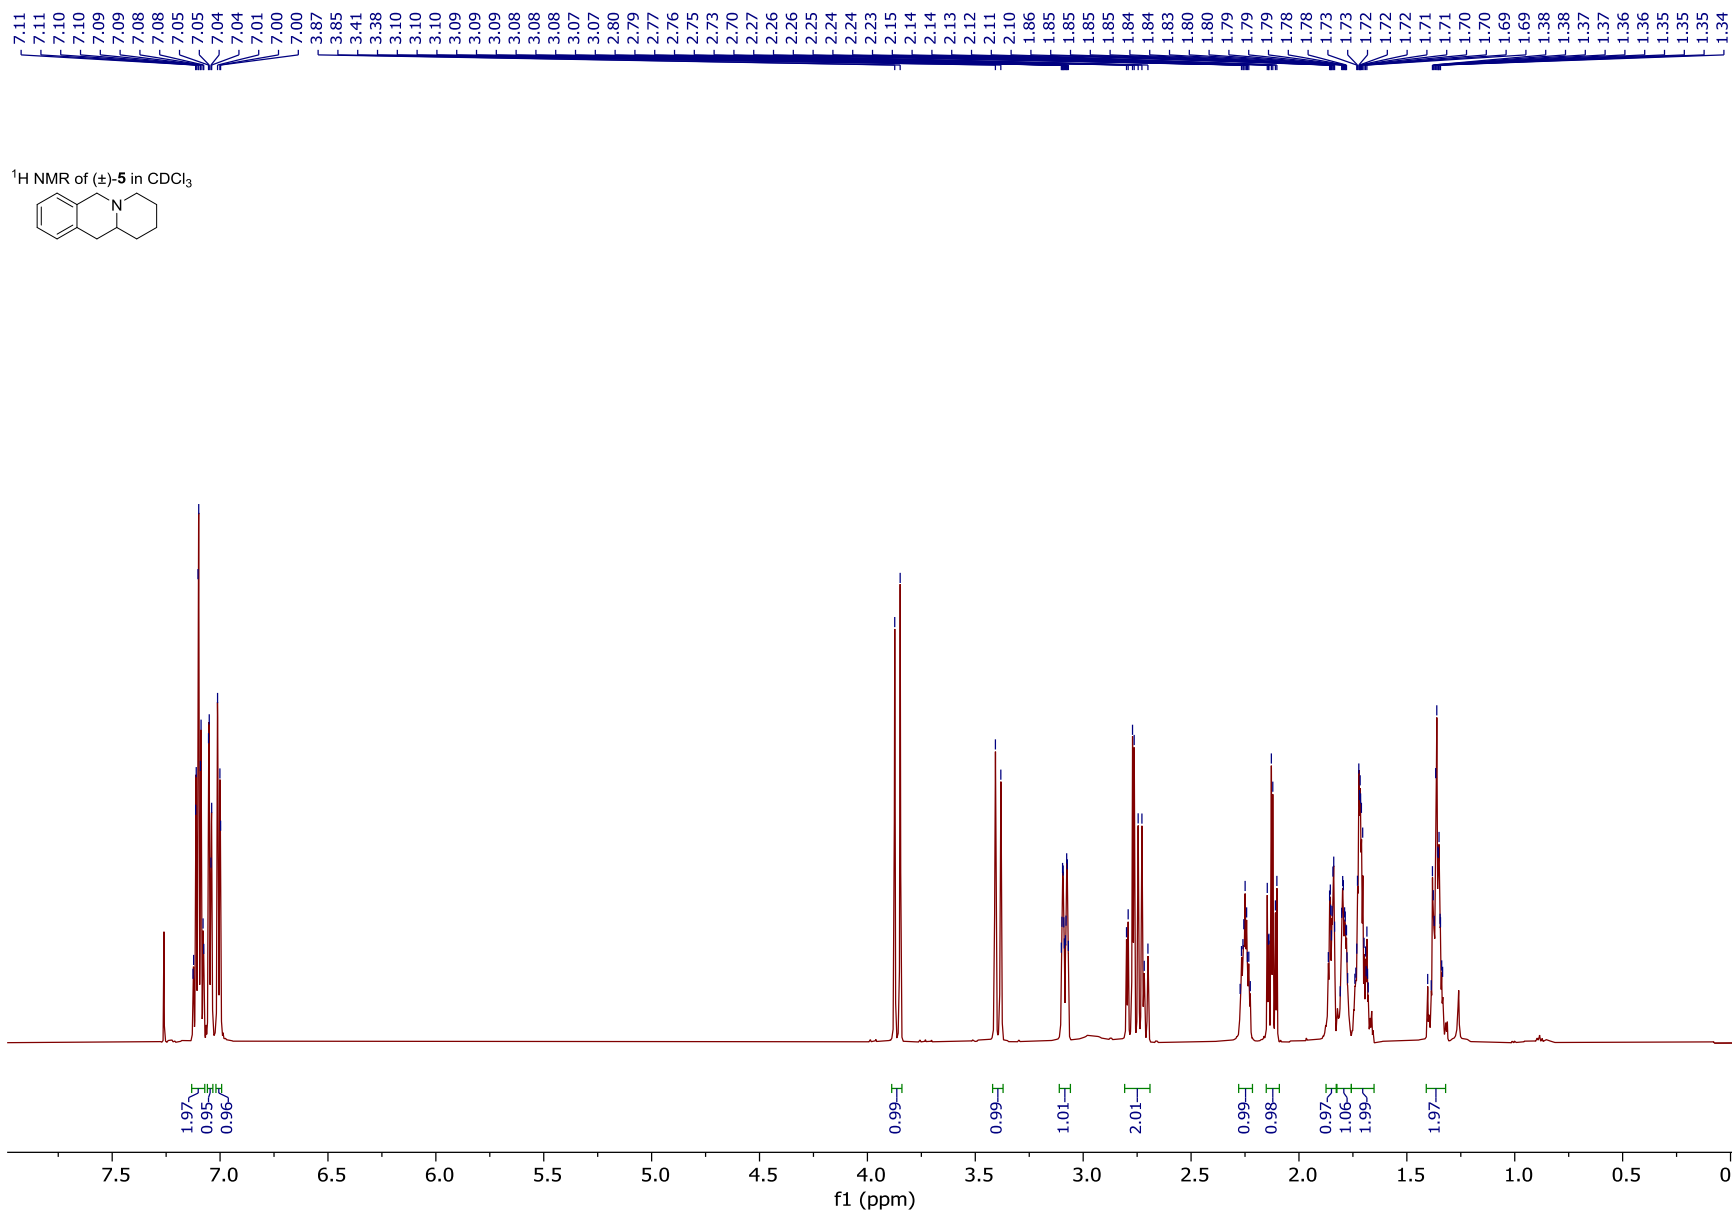

<sup>13</sup>C NMR of (±)-**5** in CDCl<sub>3</sub>

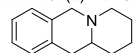

134.26  
133.99

128.08  
126.23  
126.02  
125.62

58.42  
58.39  
56.20

36.81  
33.67

25.93  
24.32

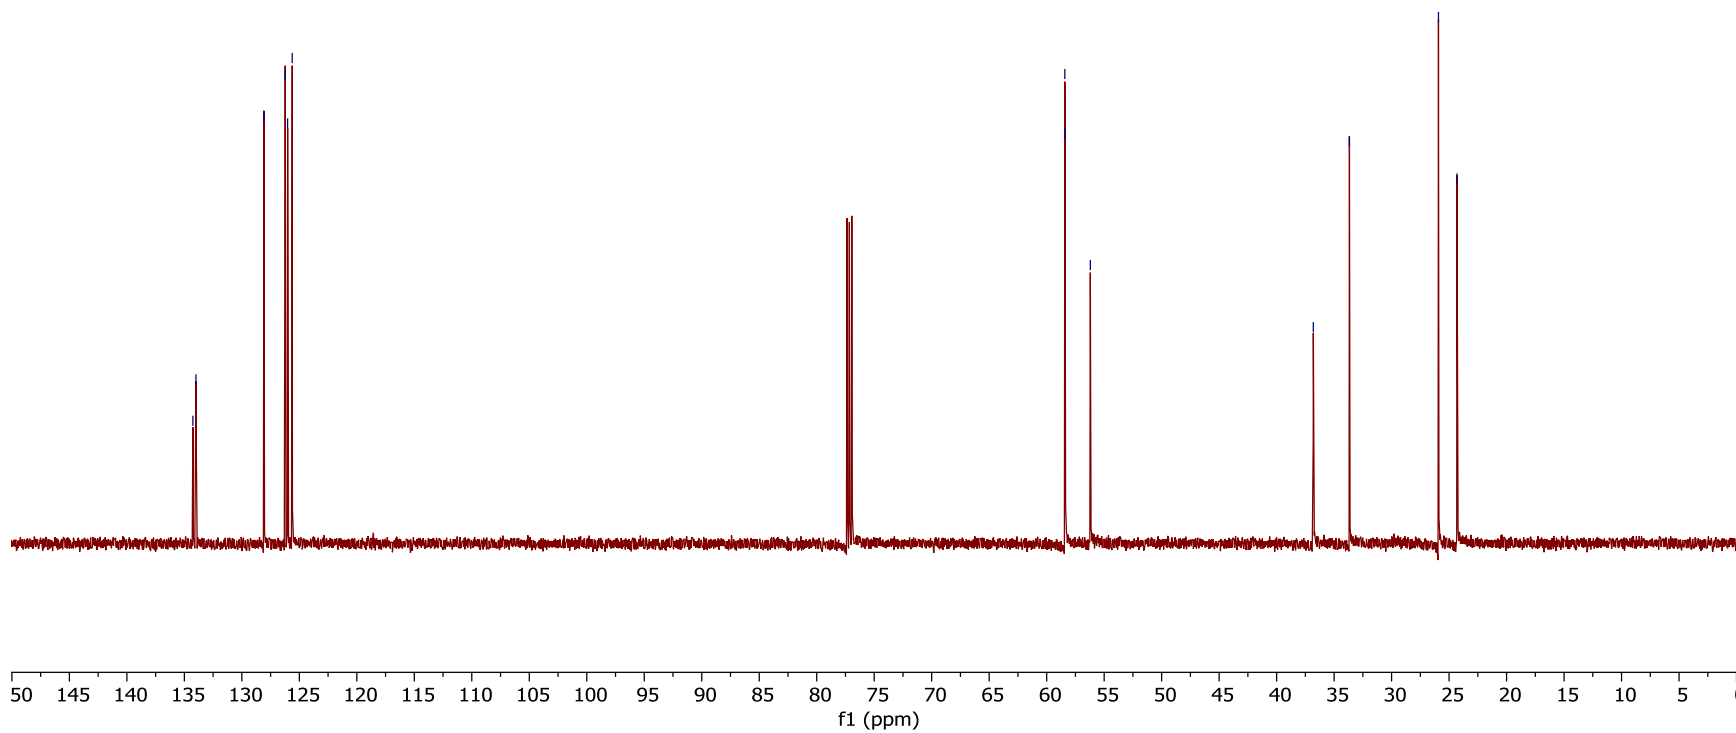

Supplement: NIHMS1662361-supplement-SI.pdf [file NIHMS1662361-supplement-SI.pdf]
